# Supplementary material
Source: publisher site journal article supplement (https://www.dovepress.com/get_supplementary_file.php?f=433840.xlsx)
Supplement: Supplementary file 1 [file get_supplementary_file.php]

## Sheet: Table S1
Table S1 | The primer sequences for real-time PCR.
Gene	Forward (5'to3')	Reverse (5'to3')
IL-1β	ACTGTTTCTAATGCCTTCCC	ATGGTTTCTTGTGACCCTGA
IL-6	TAGTCCTTCCTACCCCAATTTCC	TTGGTCCTTAGCCACTCCTTC
TNF-α	CCAGGCAGGTTCTGTCCCTT	ATAGGCACCGCCTGGAGTTC
STAT3	CAATACCATTGACCTGCCGAT	GAGCGACTCAAACTGCCCT
SOCS3	ATGGTCACCCACAGCAAGTTT	TCCAGTAGAATCCGCTCTCCT

## Sheet: Table S2
Table S2 | Compound of Tinglizi (13) and Dazao (55) from TCMSP and BATMAN-TCM.
Mol ID	Compound	herb	Source
MOL002211	11,14-eicosadienoic acid	Tinglizi	TCMSP
MOL000296	hederagenin	Tinglizi	TCMSP
MOL000354	isorhamnetin	Tinglizi	TCMSP
MOL000358	beta-sitosterol	Tinglizi	TCMSP
MOL003905	K-STROPHANTHOSIDE	Tinglizi	TCMSP
MOL003906	K-STROPHANTHOSIDE_qt	Tinglizi	TCMSP
MOL003907	erysimoside	Tinglizi	TCMSP
MOL003908	Cynotoxin	Tinglizi	TCMSP
MOL003909	evobioside	Tinglizi	TCMSP
MOL003927	Dihomolinolenic acid	Tinglizi	TCMSP
MOL000422	kaempferol	Tinglizi	TCMSP
MOL000098	quercetin	Tinglizi	TCMSP
MOL003913	Helveticoside	Tinglizi	BATMAN-TCM
MOL012940	Spiradine A	Dazao	TCMSP
MOL012946	zizyphus saponin I_qt	Dazao	TCMSP
MOL012961	jujuboside A_qt	Dazao	TCMSP
MOL012980	Daechuine S6	Dazao	TCMSP
MOL012981	Daechuine S7	Dazao	TCMSP
MOL012986	Jujubasaponin V_qt	Dazao	TCMSP
MOL012989	Jujuboside C_qt	Dazao	TCMSP
MOL012992	Mauritine D	Dazao	TCMSP
MOL001454	berberine	Dazao	TCMSP
MOL001522	(S)-Coclaurine	Dazao	TCMSP
MOL000449	Stigmasterol	Dazao	TCMSP
MOL003410	Ziziphin_qt	Dazao	TCMSP
MOL000358	beta-sitosterol	Dazao	TCMSP
MOL004350	Ruvoside_qt	Dazao	TCMSP
MOL005360	malkangunin	Dazao	TCMSP
MOL007213	Nuciferin	Dazao	TCMSP
MOL000787	Fumarine	Dazao	TCMSP
MOL008034	21302-79-4	Dazao	TCMSP
MOL002773	beta-carotene	Dazao	TCMSP
MOL000096	(-)-catechin	Dazao	TCMSP
MOL000098	quercetin	Dazao	TCMSP
MOL013357	(3S,6R,8S,9S,10R,13R,14S,17R)-17-[(1R,4R)-4-ethyl-1,5-dimethylhexyl]-10,13-dimethyl-2,3,6,7,8,9,11,12,14,15,16,17-dodecahydro-1H-cyclopenta[a]phenanthrene-3,6-diol	Dazao	TCMSP
MOL004349	Ruvoside	Dazao	BATMAN-TCM
MOL012941	Sylvestrene	Dazao	BATMAN-TCM
MOL012988	Jujuboside A1	Dazao	BATMAN-TCM
MOL001551	Betulin	Dazao	BATMAN-TCM
MOL004082	Stearin	Dazao	BATMAN-TCM
MOL011455	20-Hexadecanoylingenol	Dazao	BATMAN-TCM
MOL006077	Vitamin B1	Dazao	BATMAN-TCM
MOL012990	Jujuboside C	Dazao	BATMAN-TCM
MOL001528	Jujuboside B	Dazao	BATMAN-TCM
MOL012985	Jujubasaponin V	Dazao	BATMAN-TCM
MOL012974	Asimilobine	Dazao	BATMAN-TCM
MOL012987	Jujubogenin	Dazao	BATMAN-TCM
MOL002045	Stigmasterol	Dazao	BATMAN-TCM
MOL007341	Alphitolic Acid	Dazao	BATMAN-TCM
MOL012983	Jujubasaponin Vi	Dazao	BATMAN-TCM
MOL002722	Vomifoliol	Dazao	BATMAN-TCM
MOL001526	Jujuboside A	Dazao	BATMAN-TCM
MOL004498	12-O-Nicotinoylisolineolone	Dazao	BATMAN-TCM
MOL000089	Catechol	Dazao	BATMAN-TCM
MOL009148	Catharanthamine	Dazao	BATMAN-TCM
MOL005386	Tauremisin	Dazao	BATMAN-TCM
MOL001540	Spinosin	Dazao	BATMAN-TCM
MOL012943	Ziziphin	Dazao	BATMAN-TCM
MOL008498	Ursolicacid	Dazao	BATMAN-TCM
MOL000400	Riboflavine	Dazao	BATMAN-TCM
MOL005559	Maslinic Acid	Dazao	BATMAN-TCM
MOL012976	Coumestrol	Dazao	TCMSP&BATMAN-TCM
MOL012921	Stepharine	Dazao	TCMSP&BATMAN-TCM
MOL008647	Moupinamide	Dazao	TCMSP&BATMAN-TCM
MOL000783	Protoporphyrin	Dazao	TCMSP&BATMAN-TCM
MOL000627	Stepholidine	Dazao	TCMSP&BATMAN-TCM
MOL000492	(+)-catechin	Dazao	TCMSP&BATMAN-TCM
MOL000211	Mairin	Dazao	TCMSP&BATMAN-TCM

## Sheet: Table S3
Table S3 | Potential targets of Tinglizi and Dazao from TCMSP and BATMAN.
Target	Herb	Source
NCOA2	Tinglizi	TCMSP
PGR	Tinglizi	TCMSP
CHRM3	Tinglizi	TCMSP
CHRM1	Tinglizi	TCMSP
CHRM2	Tinglizi	TCMSP
ADRA1B	Tinglizi	TCMSP
GABRA1	Tinglizi	TCMSP
GRIA2	Tinglizi	TCMSP
ADH1B	Tinglizi	TCMSP
ADH1C	Tinglizi	TCMSP
LYZ	Tinglizi	TCMSP
PTGS1	Tinglizi	TCMSP
SCN5A	Tinglizi	TCMSP
PTGS2	Tinglizi	TCMSP
RXRA	Tinglizi	TCMSP
PDE3A	Tinglizi	TCMSP
SLC6A2	Tinglizi	TCMSP
NOS2	Tinglizi	TCMSP
ESR1	Tinglizi	TCMSP
AR	Tinglizi	TCMSP
PPARG	Tinglizi	TCMSP
ESR2	Tinglizi	TCMSP
DPP4	Tinglizi	TCMSP
MAPK14	Tinglizi	TCMSP
GSK3B	Tinglizi	TCMSP
HSP90AA1	Tinglizi	TCMSP
CDK2	Tinglizi	TCMSP
PRSS1	Tinglizi	TCMSP
CCNA2	Tinglizi	TCMSP
CALM2	Tinglizi	TCMSP
PYGM	Tinglizi	TCMSP
PPARD	Tinglizi	TCMSP
CHEK1	Tinglizi	TCMSP
AKR1B1	Tinglizi	TCMSP
NCOA1	Tinglizi	TCMSP
F7	Tinglizi	TCMSP
SERPIND1	Tinglizi	TCMSP
ACHE	Tinglizi	TCMSP
MAOB	Tinglizi	TCMSP
XDH	Tinglizi	TCMSP
KCNH2	Tinglizi	TCMSP
DRD1	Tinglizi	TCMSP
CHRM4	Tinglizi	TCMSP
HTR2A	Tinglizi	TCMSP
ADRA1D	Tinglizi	TCMSP
ADRB2	Tinglizi	TCMSP
CHRNA2	Tinglizi	TCMSP
SLC6A4	Tinglizi	TCMSP
OPRM1	Tinglizi	TCMSP
BCL2	Tinglizi	TCMSP
JUN	Tinglizi	TCMSP
PON1	Tinglizi	TCMSP
MAP2	Tinglizi	TCMSP
NR3C2	Tinglizi	TCMSP
TOP2B	Tinglizi	TCMSP
CD40LG	Tinglizi	TCMSP
MAPK8	Tinglizi	TCMSP
MMP1	Tinglizi	TCMSP
CDK1	Tinglizi	TCMSP
HMOX1	Tinglizi	TCMSP
CYP3A4	Tinglizi	TCMSP
CYP1A2	Tinglizi	TCMSP
SELE	Tinglizi	TCMSP
VCAM1	Tinglizi	TCMSP
ALOX5	Tinglizi	TCMSP
GSTP1	Tinglizi	TCMSP
AHR	Tinglizi	TCMSP
INSR	Tinglizi	TCMSP
GSTM1	Tinglizi	TCMSP
GSTM2	Tinglizi	TCMSP
AKR1C3	Tinglizi	TCMSP
PLAU	Tinglizi	TCMSP
IL6	Tinglizi	TCMSP
CTSD	Tinglizi	TCMSP
IFNG	Tinglizi	TCMSP
SULT1E1	Tinglizi	TCMSP
EGF	Tinglizi	TCMSP
IL2	Tinglizi	TCMSP
CCL2	Tinglizi	TCMSP
IL1B	Tinglizi	TCMSP
MPO	Tinglizi	TCMSP
PLAT	Tinglizi	TCMSP
GJA1	Tinglizi	TCMSP
VEGFA	Tinglizi	TCMSP
HSPA5	Tinglizi	TCMSP
ACPP	Tinglizi	TCMSP
MMP3	Tinglizi	TCMSP
THBD	Tinglizi	TCMSP
F3	Tinglizi	TCMSP
NQO1	Tinglizi	TCMSP
F7	Tinglizi	TCMSP
COL1A1	Tinglizi	TCMSP
TOP1	Tinglizi	TCMSP
RB1	Tinglizi	TCMSP
COL3A1	Tinglizi	TCMSP
POR	Tinglizi	TCMSP
PTGER3	Tinglizi	TCMSP
SOD1	Tinglizi	TCMSP
ODC1	Tinglizi	TCMSP
TP53	Tinglizi	TCMSP
ACACA	Tinglizi	TCMSP
MMP2	Tinglizi	TCMSP
MGAM	Tinglizi	TCMSP
ADD1	Tinglizi	BATMAN-TCM
ATP1A1	Tinglizi	BATMAN-TCM
CFL1	Tinglizi	BATMAN-TCM
DNMT1	Tinglizi	BATMAN-TCM
EZH2	Tinglizi	BATMAN-TCM
FXYD1	Tinglizi	BATMAN-TCM
FXYD2	Tinglizi	BATMAN-TCM
FXYD7	Tinglizi	BATMAN-TCM
GTF2F2	Tinglizi	BATMAN-TCM
HGS	Tinglizi	BATMAN-TCM
MAPK3	Tinglizi	BATMAN-TCM
NDRG1	Tinglizi	BATMAN-TCM
NR3C1	Tinglizi	BATMAN-TCM
PRKCA	Tinglizi	BATMAN-TCM
SMAD2	Tinglizi	BATMAN-TCM
SNX6	Tinglizi	BATMAN-TCM
TNFRSF1A	Tinglizi	BATMAN-TCM
TNFRSF1B	Tinglizi	BATMAN-TCM
TPT1	Tinglizi	BATMAN-TCM
TRADD	Tinglizi	BATMAN-TCM
MAPK1	Tinglizi	TCMSP&BATMAN-TCM
EGFR	Tinglizi	TCMSP&BATMAN-TCM
MMP2	Dazao	TCMSP
MGAM	Dazao	TCMSP
COL3A1	Dazao	TCMSP
SULT1E1	Dazao	TCMSP
KDR	Dazao	TCMSP
PLAU	Dazao	TCMSP
NOS2	Dazao	TCMSP
MMP3	Dazao	TCMSP
GJA1	Dazao	TCMSP
FASN	Dazao	TCMSP
CYP1A2	Dazao	TCMSP
GSTM1	Dazao	TCMSP
ACACA	Dazao	TCMSP
PLAT	Dazao	TCMSP
DPP4	Dazao	TCMSP
IL2	Dazao	TCMSP
PON1	Dazao	TCMSP
CDK1	Dazao	TCMSP
IFNG	Dazao	TCMSP
LACTBL1	Dazao	TCMSP
CACNA1S	Dazao	TCMSP
AKR1B1	Dazao	TCMSP
CA2	Dazao	TCMSP
MAP2	Dazao	TCMSP
GSTP1	Dazao	TCMSP
RB1	Dazao	TCMSP
PDE10A	Dazao	TCMSP
SELE	Dazao	TCMSP
ODC1	Dazao	TCMSP
THBD	Dazao	TCMSP
VCAM1	Dazao	TCMSP
INSR	Dazao	TCMSP
EGF	Dazao	TCMSP
MPO	Dazao	TCMSP
CYP2B6	Dazao	TCMSP
TOP2B	Dazao	TCMSP
F3	Dazao	TCMSP
CASP7	Dazao	TCMSP
PDE3A	Dazao	TCMSP
CTSD	Dazao	TCMSP
VEGFA	Dazao	TCMSP
GSTM2	Dazao	TCMSP
MMP10	Dazao	TCMSP
CTRB1	Dazao	TCMSP
SERPIND1	Dazao	TCMSP
CCL2	Dazao	TCMSP
CD40LG	Dazao	TCMSP
MMP1	Dazao	TCMSP
IL6	Dazao	TCMSP
PRSS1	Dazao	TCMSP
LTA4H	Dazao	TCMSP
TOP1	Dazao	TCMSP
VDR	Dazao	BATMAN-TCM
MMS19	Dazao	BATMAN-TCM
NPDC1	Dazao	BATMAN-TCM
ACE	Dazao	BATMAN-TCM
PPARD	Dazao	BATMAN-TCM
HMGCR	Dazao	BATMAN-TCM
RYR3	Dazao	BATMAN-TCM
SLC30A9	Dazao	BATMAN-TCM
PAX7	Dazao	BATMAN-TCM
SMARCD3	Dazao	BATMAN-TCM
TUBE1	Dazao	BATMAN-TCM
TUBD1	Dazao	BATMAN-TCM
STX3	Dazao	BATMAN-TCM
EDN1	Dazao	BATMAN-TCM
GSR	Dazao	BATMAN-TCM
CYP11A1	Dazao	BATMAN-TCM
PTMA	Dazao	BATMAN-TCM
CXCR4	Dazao	BATMAN-TCM
PRADC1	Dazao	BATMAN-TCM
COX5A	Dazao	BATMAN-TCM
RXRG	Dazao	BATMAN-TCM
EIF6	Dazao	BATMAN-TCM
AIFM1	Dazao	BATMAN-TCM
CACNA1D	Dazao	BATMAN-TCM
CYBA	Dazao	BATMAN-TCM
IGF1	Dazao	BATMAN-TCM
SOS1	Dazao	BATMAN-TCM
MED20	Dazao	BATMAN-TCM
PAK1	Dazao	BATMAN-TCM
MNAT1	Dazao	BATMAN-TCM
PTEN	Dazao	BATMAN-TCM
TUBA4A	Dazao	BATMAN-TCM
ANXA1	Dazao	BATMAN-TCM
SLC23A1	Dazao	BATMAN-TCM
RLBP1	Dazao	BATMAN-TCM
MTA2	Dazao	BATMAN-TCM
EP300	Dazao	BATMAN-TCM
MC4R	Dazao	BATMAN-TCM
PROZ	Dazao	BATMAN-TCM
POU4F2	Dazao	BATMAN-TCM
KCNA6	Dazao	BATMAN-TCM
HTR1A	Dazao	BATMAN-TCM
DDX5	Dazao	BATMAN-TCM
RARA	Dazao	BATMAN-TCM
RDH13	Dazao	BATMAN-TCM
ABHD5	Dazao	BATMAN-TCM
SOD2	Dazao	BATMAN-TCM
MKNK2	Dazao	BATMAN-TCM
PTPN1	Dazao	BATMAN-TCM
SMAD2	Dazao	BATMAN-TCM
CCS	Dazao	BATMAN-TCM
CHD9	Dazao	BATMAN-TCM
GADD45G	Dazao	BATMAN-TCM
KMT2D	Dazao	BATMAN-TCM
RNF14	Dazao	BATMAN-TCM
BGLAP	Dazao	BATMAN-TCM
COX6C	Dazao	BATMAN-TCM
TUBB2A	Dazao	BATMAN-TCM
DAB2	Dazao	BATMAN-TCM
MTNR1B	Dazao	BATMAN-TCM
PELP1	Dazao	BATMAN-TCM
PPARA	Dazao	BATMAN-TCM
CNR2	Dazao	BATMAN-TCM
OSBPL8	Dazao	BATMAN-TCM
PLD2	Dazao	BATMAN-TCM
SLCO1B3	Dazao	BATMAN-TCM
ACADM	Dazao	BATMAN-TCM
PIAS2	Dazao	BATMAN-TCM
SMARCD1	Dazao	BATMAN-TCM
PNRC2	Dazao	BATMAN-TCM
NR2F1	Dazao	BATMAN-TCM
ARX	Dazao	BATMAN-TCM
ACAD8	Dazao	BATMAN-TCM
TUBB2B	Dazao	BATMAN-TCM
FADS1	Dazao	BATMAN-TCM
HTR2B	Dazao	BATMAN-TCM
LEP	Dazao	BATMAN-TCM
GTF2H1	Dazao	BATMAN-TCM
ZPR1	Dazao	BATMAN-TCM
PTGER2	Dazao	BATMAN-TCM
DARS	Dazao	BATMAN-TCM
VKORC1L1	Dazao	BATMAN-TCM
OXT	Dazao	BATMAN-TCM
SHC1	Dazao	BATMAN-TCM
TRPM8	Dazao	BATMAN-TCM
COPS5	Dazao	BATMAN-TCM
STX1A	Dazao	BATMAN-TCM
ACY1	Dazao	BATMAN-TCM
BRCA1	Dazao	BATMAN-TCM
PPP5C	Dazao	BATMAN-TCM
CDC25B	Dazao	BATMAN-TCM
CRYZL1	Dazao	BATMAN-TCM
GPX7	Dazao	BATMAN-TCM
SCGB1A1	Dazao	BATMAN-TCM
PRKCB	Dazao	BATMAN-TCM
SLC23A2	Dazao	BATMAN-TCM
NOS1	Dazao	BATMAN-TCM
COX6B1	Dazao	BATMAN-TCM
ACP5	Dazao	BATMAN-TCM
SLC5A6	Dazao	BATMAN-TCM
BAZ1B	Dazao	BATMAN-TCM
NR1H3	Dazao	BATMAN-TCM
ABCG1	Dazao	BATMAN-TCM
ATAD2	Dazao	BATMAN-TCM
VKORC1	Dazao	BATMAN-TCM
RGS3	Dazao	BATMAN-TCM
PDLIM1	Dazao	BATMAN-TCM
GADD45A	Dazao	BATMAN-TCM
MTA3	Dazao	BATMAN-TCM
FOXO4	Dazao	BATMAN-TCM
BIN3	Dazao	BATMAN-TCM
ALOX5AP	Dazao	BATMAN-TCM
SLC8A1	Dazao	BATMAN-TCM
HTR1B	Dazao	BATMAN-TCM
RXFP4	Dazao	BATMAN-TCM
SLC35F6	Dazao	BATMAN-TCM
ISL1	Dazao	BATMAN-TCM
PLA2G1B	Dazao	BATMAN-TCM
DGKI	Dazao	BATMAN-TCM
KCND1	Dazao	BATMAN-TCM
POLR1B	Dazao	BATMAN-TCM
PRDM2	Dazao	BATMAN-TCM
SMAD3	Dazao	BATMAN-TCM
KCNA1	Dazao	BATMAN-TCM
MED17	Dazao	BATMAN-TCM
NFIB	Dazao	BATMAN-TCM
MDM2	Dazao	BATMAN-TCM
DAP3	Dazao	BATMAN-TCM
KCNC1	Dazao	BATMAN-TCM
BLVRA	Dazao	BATMAN-TCM
AKT2	Dazao	BATMAN-TCM
GNAI1	Dazao	BATMAN-TCM
TUBA8	Dazao	BATMAN-TCM
ZRANB3	Dazao	BATMAN-TCM
CYGB	Dazao	BATMAN-TCM
HTR7	Dazao	BATMAN-TCM
NCOR2	Dazao	BATMAN-TCM
SP1	Dazao	BATMAN-TCM
UBE2I	Dazao	BATMAN-TCM
MED7	Dazao	BATMAN-TCM
CCNE1	Dazao	BATMAN-TCM
CYP4F2	Dazao	BATMAN-TCM
KCNA2	Dazao	BATMAN-TCM
PCYT1A	Dazao	BATMAN-TCM
HRH4	Dazao	BATMAN-TCM
MAGI2	Dazao	BATMAN-TCM
APOE	Dazao	BATMAN-TCM
PIAS3	Dazao	BATMAN-TCM
ADORA1	Dazao	BATMAN-TCM
NR4A1	Dazao	BATMAN-TCM
CYB5R1	Dazao	BATMAN-TCM
DAB2IP	Dazao	BATMAN-TCM
SLC25A32	Dazao	BATMAN-TCM
ALDH2	Dazao	BATMAN-TCM
FOXA1	Dazao	BATMAN-TCM
FADD	Dazao	BATMAN-TCM
CDK8	Dazao	BATMAN-TCM
RBM23	Dazao	BATMAN-TCM
RNF4	Dazao	BATMAN-TCM
FAS	Dazao	BATMAN-TCM
ERBB2	Dazao	BATMAN-TCM
GRB2	Dazao	BATMAN-TCM
ORM1	Dazao	BATMAN-TCM
ARNT	Dazao	BATMAN-TCM
HSPD1	Dazao	BATMAN-TCM
ARHGEF15	Dazao	BATMAN-TCM
ATP4A	Dazao	BATMAN-TCM
BDNF	Dazao	BATMAN-TCM
SRD5A1	Dazao	BATMAN-TCM
SOD3	Dazao	BATMAN-TCM
TDG	Dazao	BATMAN-TCM
REXO4	Dazao	BATMAN-TCM
KCNA3	Dazao	BATMAN-TCM
ABCA1	Dazao	BATMAN-TCM
PAK6	Dazao	BATMAN-TCM
SORCS3	Dazao	BATMAN-TCM
WIPI1	Dazao	BATMAN-TCM
C14orf1	Dazao	BATMAN-TCM
TUBB	Dazao	BATMAN-TCM
JUNB	Dazao	BATMAN-TCM
YWHAQ	Dazao	BATMAN-TCM
SMARCA4	Dazao	BATMAN-TCM
SLC18A2	Dazao	BATMAN-TCM
SLC38A3	Dazao	BATMAN-TCM
TUBB6	Dazao	BATMAN-TCM
BCHE	Dazao	BATMAN-TCM
HTR6	Dazao	BATMAN-TCM
AKR1D1	Dazao	BATMAN-TCM
ACOX1	Dazao	BATMAN-TCM
DRD3	Dazao	BATMAN-TCM
TRAM1	Dazao	BATMAN-TCM
MED1	Dazao	BATMAN-TCM
WDR77	Dazao	BATMAN-TCM
RAB3A	Dazao	BATMAN-TCM
GABRD	Dazao	BATMAN-TCM
COX8A	Dazao	BATMAN-TCM
CCNT1	Dazao	BATMAN-TCM
RDH12	Dazao	BATMAN-TCM
THRB	Dazao	BATMAN-TCM
NPR1	Dazao	BATMAN-TCM
DAO	Dazao	BATMAN-TCM
GABRP	Dazao	BATMAN-TCM
ADORA2A	Dazao	BATMAN-TCM
TPK1	Dazao	BATMAN-TCM
IGF1R	Dazao	BATMAN-TCM
F9	Dazao	BATMAN-TCM
MED13	Dazao	BATMAN-TCM
LRRC4B	Dazao	BATMAN-TCM
F10	Dazao	BATMAN-TCM
RNASE2	Dazao	BATMAN-TCM
ABAT	Dazao	BATMAN-TCM
TUBA3C	Dazao	BATMAN-TCM
CAV1	Dazao	BATMAN-TCM
ESRRA	Dazao	BATMAN-TCM
ALDH1A1	Dazao	BATMAN-TCM
NLGN1	Dazao	BATMAN-TCM
TUBA1C	Dazao	BATMAN-TCM
TAF10	Dazao	BATMAN-TCM
MAPK3	Dazao	BATMAN-TCM
NCOR1	Dazao	BATMAN-TCM
NR0B1	Dazao	BATMAN-TCM
CRIPAK	Dazao	BATMAN-TCM
TXNRD1	Dazao	BATMAN-TCM
DPYD	Dazao	BATMAN-TCM
TUBG1	Dazao	BATMAN-TCM
PTGES3	Dazao	BATMAN-TCM
OXTR	Dazao	BATMAN-TCM
TAP1	Dazao	BATMAN-TCM
TSC2	Dazao	BATMAN-TCM
KDM5A	Dazao	BATMAN-TCM
BTF3	Dazao	BATMAN-TCM
NRIP1	Dazao	BATMAN-TCM
HDAC2	Dazao	BATMAN-TCM
PRMT2	Dazao	BATMAN-TCM
MED10	Dazao	BATMAN-TCM
TPO	Dazao	BATMAN-TCM
CRYZ	Dazao	BATMAN-TCM
HSP90AB1	Dazao	BATMAN-TCM
DNAJB9	Dazao	BATMAN-TCM
FOLR1	Dazao	BATMAN-TCM
AGT	Dazao	BATMAN-TCM
POU4F1	Dazao	BATMAN-TCM
HSPE1	Dazao	BATMAN-TCM
OPRK1	Dazao	BATMAN-TCM
TKTL1	Dazao	BATMAN-TCM
GTF2B	Dazao	BATMAN-TCM
PLD1	Dazao	BATMAN-TCM
CDK7	Dazao	BATMAN-TCM
BAG1	Dazao	BATMAN-TCM
CD300A	Dazao	BATMAN-TCM
DBH	Dazao	BATMAN-TCM
HRH1	Dazao	BATMAN-TCM
CITED1	Dazao	BATMAN-TCM
DNAJA3	Dazao	BATMAN-TCM
HNF4A	Dazao	BATMAN-TCM
CHGA	Dazao	BATMAN-TCM
HSPA4	Dazao	BATMAN-TCM
FBP1	Dazao	BATMAN-TCM
ADH4	Dazao	BATMAN-TCM
CBR4	Dazao	BATMAN-TCM
RELA	Dazao	BATMAN-TCM
TRRAP	Dazao	BATMAN-TCM
MED21	Dazao	BATMAN-TCM
PRKCD	Dazao	BATMAN-TCM
NQO2	Dazao	BATMAN-TCM
GGCX	Dazao	BATMAN-TCM
DUT	Dazao	BATMAN-TCM
AKR1C2	Dazao	BATMAN-TCM
MED14	Dazao	BATMAN-TCM
NOS3	Dazao	BATMAN-TCM
DDX54	Dazao	BATMAN-TCM
NPR2	Dazao	BATMAN-TCM
FADS2	Dazao	BATMAN-TCM
OXER1	Dazao	BATMAN-TCM
TNFRSF14	Dazao	BATMAN-TCM
GABRQ	Dazao	BATMAN-TCM
ADH1A	Dazao	BATMAN-TCM
PRLR	Dazao	BATMAN-TCM
MED12	Dazao	BATMAN-TCM
TRIM28	Dazao	BATMAN-TCM
TRIP4	Dazao	BATMAN-TCM
NR2C2	Dazao	BATMAN-TCM
ALDH1A2	Dazao	BATMAN-TCM
GABRG1	Dazao	BATMAN-TCM
APOC2	Dazao	BATMAN-TCM
STAT5A	Dazao	BATMAN-TCM
MTTP	Dazao	BATMAN-TCM
AGTRAP	Dazao	BATMAN-TCM
PTPN6	Dazao	BATMAN-TCM
SRD5A2	Dazao	BATMAN-TCM
KCNA5	Dazao	BATMAN-TCM
FKBP4	Dazao	BATMAN-TCM
ADRA1A	Dazao	BATMAN-TCM
PTPN2	Dazao	BATMAN-TCM
TUBA3E	Dazao	BATMAN-TCM
ESRRG	Dazao	BATMAN-TCM
RDH5	Dazao	BATMAN-TCM
FLAD1	Dazao	BATMAN-TCM
PTGER1	Dazao	BATMAN-TCM
KIF14	Dazao	BATMAN-TCM
SRC	Dazao	BATMAN-TCM
CYB5R3	Dazao	BATMAN-TCM
TUBA1B	Dazao	BATMAN-TCM
XBP1	Dazao	BATMAN-TCM
MTA1	Dazao	BATMAN-TCM
CEBPA	Dazao	BATMAN-TCM
CDK2	Dazao	BATMAN-TCM
NR0B2	Dazao	BATMAN-TCM
FHL1	Dazao	BATMAN-TCM
RBFOX2	Dazao	BATMAN-TCM
ABCB1	Dazao	BATMAN-TCM
CNR1	Dazao	BATMAN-TCM
CRMP1	Dazao	BATMAN-TCM
USF1	Dazao	BATMAN-TCM
SLC46A1	Dazao	BATMAN-TCM
CCNH	Dazao	BATMAN-TCM
PPP2CA	Dazao	BATMAN-TCM
TADA3	Dazao	BATMAN-TCM
NR1H4	Dazao	BATMAN-TCM
RDH8	Dazao	BATMAN-TCM
COX7A1	Dazao	BATMAN-TCM
SEC14L2	Dazao	BATMAN-TCM
GABRA4	Dazao	BATMAN-TCM
COX5B	Dazao	BATMAN-TCM
KCNA4	Dazao	BATMAN-TCM
ATP1A1	Dazao	BATMAN-TCM
NR2F6	Dazao	BATMAN-TCM
PIK3R3	Dazao	BATMAN-TCM
RDH14	Dazao	BATMAN-TCM
GUCY1B3	Dazao	BATMAN-TCM
HEXIM1	Dazao	BATMAN-TCM
NR3C1	Dazao	BATMAN-TCM
HTR1D	Dazao	BATMAN-TCM
FABP6	Dazao	BATMAN-TCM
THRA	Dazao	BATMAN-TCM
DDX17	Dazao	BATMAN-TCM
CYP17A1	Dazao	BATMAN-TCM
CALM3	Dazao	BATMAN-TCM
GFER	Dazao	BATMAN-TCM
PPP1CC	Dazao	BATMAN-TCM
DGKA	Dazao	BATMAN-TCM
DNTTIP2	Dazao	BATMAN-TCM
GABRB3	Dazao	BATMAN-TCM
GABBR1	Dazao	BATMAN-TCM
BMP6	Dazao	BATMAN-TCM
KCNB2	Dazao	BATMAN-TCM
SP3	Dazao	BATMAN-TCM
NPPA	Dazao	BATMAN-TCM
TUBG2	Dazao	BATMAN-TCM
FECH	Dazao	BATMAN-TCM
TCF3	Dazao	BATMAN-TCM
TYR	Dazao	BATMAN-TCM
PPARGC1A	Dazao	BATMAN-TCM
SLC19A3	Dazao	BATMAN-TCM
IYD	Dazao	BATMAN-TCM
DHRS4	Dazao	BATMAN-TCM
EIF2AK1	Dazao	BATMAN-TCM
SERPINE1	Dazao	BATMAN-TCM
KIF1A	Dazao	BATMAN-TCM
NR2C1	Dazao	BATMAN-TCM
RNASE1	Dazao	BATMAN-TCM
STUB1	Dazao	BATMAN-TCM
THTPA	Dazao	BATMAN-TCM
NCOA3	Dazao	BATMAN-TCM
CYP19A1	Dazao	BATMAN-TCM
WDR5	Dazao	BATMAN-TCM
ERO1B	Dazao	BATMAN-TCM
SEC14L3	Dazao	BATMAN-TCM
ASH2L	Dazao	BATMAN-TCM
CUEDC2	Dazao	BATMAN-TCM
MAPK14	Dazao	BATMAN-TCM
FABP3	Dazao	BATMAN-TCM
ALDH1A3	Dazao	BATMAN-TCM
CUL4B	Dazao	BATMAN-TCM
YWHAH	Dazao	BATMAN-TCM
RAPGEF2	Dazao	BATMAN-TCM
SNTG2	Dazao	BATMAN-TCM
GABRB1	Dazao	BATMAN-TCM
JUND	Dazao	BATMAN-TCM
COX2	Dazao	BATMAN-TCM
SVIL	Dazao	BATMAN-TCM
PHB2	Dazao	BATMAN-TCM
TNF	Dazao	BATMAN-TCM
PSMC5	Dazao	BATMAN-TCM
LCK	Dazao	BATMAN-TCM
GRIP1	Dazao	BATMAN-TCM
PAXBP1	Dazao	BATMAN-TCM
GLRB	Dazao	BATMAN-TCM
DLG4	Dazao	BATMAN-TCM
PRPF6	Dazao	BATMAN-TCM
AKAP13	Dazao	BATMAN-TCM
ADH7	Dazao	BATMAN-TCM
NSD1	Dazao	BATMAN-TCM
MED24	Dazao	BATMAN-TCM
RPL13A	Dazao	BATMAN-TCM
NMUR2	Dazao	BATMAN-TCM
ADH1B	Dazao	BATMAN-TCM
AKR1C1	Dazao	BATMAN-TCM
PAWR	Dazao	BATMAN-TCM
KCND3	Dazao	BATMAN-TCM
KCNE5	Dazao	BATMAN-TCM
AQP8	Dazao	BATMAN-TCM
DLD	Dazao	BATMAN-TCM
CREBBP	Dazao	BATMAN-TCM
LDLR	Dazao	BATMAN-TCM
CDKN1A	Dazao	BATMAN-TCM
RBBP5	Dazao	BATMAN-TCM
RPS6KA1	Dazao	BATMAN-TCM
TUBA1A	Dazao	BATMAN-TCM
FHL2	Dazao	BATMAN-TCM
ZBTB16	Dazao	BATMAN-TCM
GABRG2	Dazao	BATMAN-TCM
ITGAV	Dazao	BATMAN-TCM
ASPA	Dazao	BATMAN-TCM
COX6A2	Dazao	BATMAN-TCM
ENPP1	Dazao	BATMAN-TCM
PPP2CB	Dazao	BATMAN-TCM
KCNB1	Dazao	BATMAN-TCM
GABRB2	Dazao	BATMAN-TCM
GABRA5	Dazao	BATMAN-TCM
FHIT	Dazao	BATMAN-TCM
AKT1	Dazao	BATMAN-TCM
UBIAD1	Dazao	BATMAN-TCM
NRXN3	Dazao	BATMAN-TCM
PIK3R1	Dazao	BATMAN-TCM
CHUK	Dazao	BATMAN-TCM
CACNG1	Dazao	BATMAN-TCM
NR1H2	Dazao	BATMAN-TCM
SEC14L4	Dazao	BATMAN-TCM
STAT3	Dazao	BATMAN-TCM
FCGR1A	Dazao	BATMAN-TCM
TCF20	Dazao	BATMAN-TCM
MIP	Dazao	BATMAN-TCM
PRKACA	Dazao	BATMAN-TCM
F2	Dazao	BATMAN-TCM
HCAR2	Dazao	BATMAN-TCM
KCNC3	Dazao	BATMAN-TCM
ETFB	Dazao	BATMAN-TCM
APOA2	Dazao	BATMAN-TCM
KCNC2	Dazao	BATMAN-TCM
TRPV3	Dazao	BATMAN-TCM
TRPA1	Dazao	BATMAN-TCM
COX1	Dazao	BATMAN-TCM
ALDH1B1	Dazao	BATMAN-TCM
TUBB4B	Dazao	BATMAN-TCM
FDXR	Dazao	BATMAN-TCM
TXNRD3	Dazao	BATMAN-TCM
CSNK2B	Dazao	BATMAN-TCM
RAB1A	Dazao	BATMAN-TCM
RBM39	Dazao	BATMAN-TCM
PRKAB1	Dazao	BATMAN-TCM
UNC119	Dazao	BATMAN-TCM
PCK1	Dazao	BATMAN-TCM
NPR3	Dazao	BATMAN-TCM
BCAR1	Dazao	BATMAN-TCM
CTNNB1	Dazao	BATMAN-TCM
COX7B	Dazao	BATMAN-TCM
CNTNAP4	Dazao	BATMAN-TCM
NFKB1	Dazao	BATMAN-TCM
GAMT	Dazao	BATMAN-TCM
GABRE	Dazao	BATMAN-TCM
PPID	Dazao	BATMAN-TCM
LDB1	Dazao	BATMAN-TCM
ANK3	Dazao	BATMAN-TCM
TUBB8	Dazao	BATMAN-TCM
TUBA3D	Dazao	BATMAN-TCM
ITGB3	Dazao	BATMAN-TCM
RBP3	Dazao	BATMAN-TCM
REN	Dazao	BATMAN-TCM
SAFB2	Dazao	BATMAN-TCM
KCND2	Dazao	BATMAN-TCM
SMARCA2	Dazao	BATMAN-TCM
CCND1	Dazao	BATMAN-TCM
IL4I1	Dazao	BATMAN-TCM
CYP2E1	Dazao	BATMAN-TCM
C2orf83	Dazao	BATMAN-TCM
NOTCH2	Dazao	BATMAN-TCM
CRLF1	Dazao	BATMAN-TCM
CERS2	Dazao	BATMAN-TCM
COX4I1	Dazao	BATMAN-TCM
RPL31	Dazao	BATMAN-TCM
F12	Dazao	BATMAN-TCM
UBE3A	Dazao	BATMAN-TCM
GABRG3	Dazao	BATMAN-TCM
RLIM	Dazao	BATMAN-TCM
SLCO1B1	Dazao	BATMAN-TCM
RFX4	Dazao	BATMAN-TCM
HSD11B1	Dazao	BATMAN-TCM
FKBP5	Dazao	BATMAN-TCM
BCAS2	Dazao	BATMAN-TCM
AGTR1	Dazao	BATMAN-TCM
SPARC	Dazao	BATMAN-TCM
KCNIP2	Dazao	BATMAN-TCM
PRMT1	Dazao	BATMAN-TCM
GABRA2	Dazao	BATMAN-TCM
CPT1A	Dazao	BATMAN-TCM
EIF3I	Dazao	BATMAN-TCM
SREBF1	Dazao	BATMAN-TCM
SLC52A3	Dazao	BATMAN-TCM
CALY	Dazao	BATMAN-TCM
PAGR1	Dazao	BATMAN-TCM
NR1I2	Dazao	BATMAN-TCM
ALDH3B1	Dazao	BATMAN-TCM
MED6	Dazao	BATMAN-TCM
SCN10A	Dazao	BATMAN-TCM
ZNF536	Dazao	BATMAN-TCM
FOXO3	Dazao	BATMAN-TCM
ANG	Dazao	BATMAN-TCM
ITGB2	Dazao	BATMAN-TCM
NCOA7	Dazao	BATMAN-TCM
FOLR2	Dazao	BATMAN-TCM
TRIM59	Dazao	BATMAN-TCM
POU2F1	Dazao	BATMAN-TCM
COX7C	Dazao	BATMAN-TCM
KAT5	Dazao	BATMAN-TCM
MDH2	Dazao	BATMAN-TCM
SMAD4	Dazao	BATMAN-TCM
PROS1	Dazao	BATMAN-TCM
TBP	Dazao	BATMAN-TCM
SLC19A1	Dazao	BATMAN-TCM
MAS1	Dazao	BATMAN-TCM
TUBB3	Dazao	BATMAN-TCM
NELFB	Dazao	BATMAN-TCM
PHOSPHO1	Dazao	BATMAN-TCM
SLC17A7	Dazao	BATMAN-TCM
LRAT	Dazao	BATMAN-TCM
SHANK3	Dazao	BATMAN-TCM
GRIN2A	Dazao	BATMAN-TCM
CEBPB	Dazao	BATMAN-TCM
ZNF398	Dazao	BATMAN-TCM
NRXN1	Dazao	BATMAN-TCM
CYP4F11	Dazao	BATMAN-TCM
RNASE8	Dazao	BATMAN-TCM
RBP1	Dazao	BATMAN-TCM
MTCH2	Dazao	BATMAN-TCM
RETSAT	Dazao	BATMAN-TCM
SERPINF2	Dazao	BATMAN-TCM
SOX15	Dazao	BATMAN-TCM
MED16	Dazao	BATMAN-TCM
SLC35F3	Dazao	BATMAN-TCM
STRN	Dazao	BATMAN-TCM
S100A8	Dazao	BATMAN-TCM
PPARGC1B	Dazao	BATMAN-TCM
CALM1	Dazao	BATMAN-TCM
TRIM25	Dazao	BATMAN-TCM
KCNN4	Dazao	BATMAN-TCM
GABRA6	Dazao	BATMAN-TCM
CCNC	Dazao	BATMAN-TCM
GATM	Dazao	BATMAN-TCM
MGMT	Dazao	BATMAN-TCM
MPG	Dazao	BATMAN-TCM
FLII	Dazao	BATMAN-TCM
ESR2	Dazao	BATMAN-TCM
AGTR2	Dazao	BATMAN-TCM
VCP	Dazao	BATMAN-TCM
DHRS3	Dazao	BATMAN-TCM
SLC38A7	Dazao	BATMAN-TCM
NKX2-1	Dazao	BATMAN-TCM
GABRA3	Dazao	BATMAN-TCM
MAP3K1	Dazao	BATMAN-TCM
SOAT1	Dazao	BATMAN-TCM
IL13	Dazao	BATMAN-TCM
RDH11	Dazao	BATMAN-TCM
PCYT1B	Dazao	BATMAN-TCM
NOTCH1	Dazao	BATMAN-TCM
POU2F2	Dazao	BATMAN-TCM
NCOA4	Dazao	BATMAN-TCM
VAV3	Dazao	BATMAN-TCM
FOXO1	Dazao	BATMAN-TCM
COX3	Dazao	BATMAN-TCM
MTNR1A	Dazao	BATMAN-TCM
CLIC1	Dazao	BATMAN-TCM
ACTN2	Dazao	BATMAN-TCM
PRKCA	Dazao	BATMAN-TCM
FAM45A	Dazao	BATMAN-TCM
EHHADH	Dazao	BATMAN-TCM
GJA5	Dazao	BATMAN-TCM
ALDH3B2	Dazao	BATMAN-TCM
PIAS1	Dazao	BATMAN-TCM
CES1	Dazao	BATMAN-TCM
SMARCE1	Dazao	BATMAN-TCM
NCOA6	Dazao	BATMAN-TCM
NR1D1	Dazao	BATMAN-TCM
TUBB4A	Dazao	BATMAN-TCM
RNASE4	Dazao	BATMAN-TCM
ACADS	Dazao	BATMAN-TCM
ITGAL	Dazao	BATMAN-TCM
TUBB1	Dazao	BATMAN-TCM
KCNK4	Dazao	BATMAN-TCM
KCNA10	Dazao	BATMAN-TCM
ELOVL4	Dazao	BATMAN-TCM
BLVRB	Dazao	BATMAN-TCM
MED23	Dazao	BATMAN-TCM
CPT2	Dazao	BATMAN-TCM
FOLR3	Dazao	BATMAN-TCM
IVD	Dazao	BATMAN-TCM
RPS6KA3	Dazao	BATMAN-TCM
GLRA3	Dazao	BATMAN-TCM
PTGER4	Dazao	BATMAN-TCM
POLR2D	Dazao	BATMAN-TCM
C1QTNF1	Dazao	BATMAN-TCM
KCNQ1	Dazao	BATMAN-TCM
GCDH	Dazao	BATMAN-TCM
MVP	Dazao	BATMAN-TCM
PNPLA2	Dazao	BATMAN-TCM
KBTBD7	Dazao	BATMAN-TCM
NRXN2	Dazao	BATMAN-TCM
TP53I3	Dazao	BATMAN-TCM
SLC19A2	Dazao	BATMAN-TCM
ZBTB17	Dazao	BATMAN-TCM
TRPV1	Dazao	BATMAN-TCM
GADD45B	Dazao	BATMAN-TCM
SLC26A6	Dazao	BATMAN-TCM
UBC	Dazao	BATMAN-TCM
SAFB	Dazao	BATMAN-TCM
HBA2	Dazao	BATMAN-TCM
PSMB9	Dazao	BATMAN-TCM
RFK	Dazao	BATMAN-TCM
ITGB3BP	Dazao	BATMAN-TCM
ACY3	Dazao	BATMAN-TCM
TRIM24	Dazao	BATMAN-TCM
PROC	Dazao	BATMAN-TCM
S100A9	Dazao	BATMAN-TCM
IGSF21	Dazao	BATMAN-TCM
CBR1	Dazao	BATMAN-TCM
SOAT2	Dazao	BATMAN-TCM
KCNA7	Dazao	BATMAN-TCM
HBA1	Dazao	BATMAN-TCM
ADIPOQ	Dazao	BATMAN-TCM
RXRB	Dazao	BATMAN-TCM
PTGER3	Dazao	TCMSP&BATMAN-TCM
SLC6A2	Dazao	TCMSP&BATMAN-TCM
NR3C2	Dazao	TCMSP&BATMAN-TCM
XDH	Dazao	TCMSP&BATMAN-TCM
ADRA2C	Dazao	TCMSP&BATMAN-TCM
HMOX1	Dazao	TCMSP&BATMAN-TCM
SLC6A4	Dazao	TCMSP&BATMAN-TCM
CHRM5	Dazao	TCMSP&BATMAN-TCM
ALOX5	Dazao	TCMSP&BATMAN-TCM
MAOB	Dazao	TCMSP&BATMAN-TCM
RXRA	Dazao	TCMSP&BATMAN-TCM
MAPK1	Dazao	TCMSP&BATMAN-TCM
COL1A1	Dazao	TCMSP&BATMAN-TCM
ADRA2B	Dazao	TCMSP&BATMAN-TCM
HTR2C	Dazao	TCMSP&BATMAN-TCM
EGFR	Dazao	TCMSP&BATMAN-TCM
NQO1	Dazao	TCMSP&BATMAN-TCM
DRD5	Dazao	TCMSP&BATMAN-TCM
SOD1	Dazao	TCMSP&BATMAN-TCM
MAOA	Dazao	TCMSP&BATMAN-TCM
HSPA5	Dazao	TCMSP&BATMAN-TCM
BCL2	Dazao	TCMSP&BATMAN-TCM
OPRD1	Dazao	TCMSP&BATMAN-TCM
ADRA2A	Dazao	TCMSP&BATMAN-TCM
F7	Dazao	TCMSP&BATMAN-TCM
KCNH2	Dazao	TCMSP&BATMAN-TCM
HTR3A	Dazao	TCMSP&BATMAN-TCM
NCOA1	Dazao	TCMSP&BATMAN-TCM
CHRM1	Dazao	TCMSP&BATMAN-TCM
PPARG	Dazao	TCMSP&BATMAN-TCM
DRD4	Dazao	TCMSP&BATMAN-TCM
AHR	Dazao	TCMSP&BATMAN-TCM
PGR	Dazao	TCMSP&BATMAN-TCM
CHRNA2	Dazao	TCMSP&BATMAN-TCM
CHRM2	Dazao	TCMSP&BATMAN-TCM
OPRM1	Dazao	TCMSP&BATMAN-TCM
CHRM4	Dazao	TCMSP&BATMAN-TCM
TP53	Dazao	TCMSP&BATMAN-TCM
ADRB1	Dazao	TCMSP&BATMAN-TCM
DRD2	Dazao	TCMSP&BATMAN-TCM
CAT	Dazao	TCMSP&BATMAN-TCM
ADRA1B	Dazao	TCMSP&BATMAN-TCM
NCOA2	Dazao	TCMSP&BATMAN-TCM
PTGS2	Dazao	TCMSP&BATMAN-TCM
ADH1C	Dazao	TCMSP&BATMAN-TCM
IL1B	Dazao	TCMSP&BATMAN-TCM
CHRM3	Dazao	TCMSP&BATMAN-TCM
ESR1	Dazao	TCMSP&BATMAN-TCM
PTGS1	Dazao	TCMSP&BATMAN-TCM
HTR2A	Dazao	TCMSP&BATMAN-TCM
ADRB2	Dazao	TCMSP&BATMAN-TCM
ACPP	Dazao	TCMSP&BATMAN-TCM
POR	Dazao	TCMSP&BATMAN-TCM
ADRA1D	Dazao	TCMSP&BATMAN-TCM
JUN	Dazao	TCMSP&BATMAN-TCM
AR	Dazao	TCMSP&BATMAN-TCM
CALM2	Dazao	TCMSP&BATMAN-TCM
ACHE	Dazao	TCMSP&BATMAN-TCM
CYP3A4	Dazao	TCMSP&BATMAN-TCM
SCN5A	Dazao	TCMSP&BATMAN-TCM
GABRA1	Dazao	TCMSP&BATMAN-TCM
SLC6A3	Dazao	TCMSP&BATMAN-TCM
HSP90AA1	Dazao	TCMSP&BATMAN-TCM
DRD1	Dazao	TCMSP&BATMAN-TCM

## Sheet: Table S4
Table S4 | ALI and ARDS related targets from four Datebases.
Gene symbol	Datebase
DPM2	GeneCards
ACTN4	GeneCards
RPS17	GeneCards
ABCA3	GeneCards
PLCE1	GeneCards
CEP250	GeneCards
TMEM216	GeneCards
PAX7	GeneCards
KCNMA1	GeneCards
KCNJ2	GeneCards
PINK1	GeneCards
VPS33A	GeneCards
ERCC5	GeneCards
IFT52	GeneCards
ITGA5	GeneCards
CNTNAP1	GeneCards
PSTPIP1	GeneCards
NDUFS6	GeneCards
MEFV	GeneCards
ECHS1	GeneCards
NMBR	GeneCards
PDHA1	GeneCards
SLC4A1	GeneCards
ABCB7	GeneCards
TKT	GeneCards
CYP11A1	GeneCards
HSPB1	GeneCards
INPP5E	GeneCards
ABCC6	GeneCards
MPL	GeneCards
SLC25A3	GeneCards
RMRP	GeneCards
ADAM12	GeneCards
IRAK1	GeneCards
CFHR5	GeneCards
MIR20A	GeneCards
GAS5	GeneCards
MIRLET7G	GeneCards
GALNT3	GeneCards
CHD8	GeneCards
IFT122	GeneCards
RBM15	GeneCards
GP1BA	GeneCards
NTRK1	GeneCards
MYMK	GeneCards
GDF15	GeneCards
EP300	GeneCards
B9D1	GeneCards
NKX2-5	GeneCards
DTNBP1	GeneCards
COL4A5	GeneCards
ZEB1	GeneCards
ERG	GeneCards
NDUFS1	GeneCards
MIR582	GeneCards
PARN	GeneCards
MIR15A	GeneCards
HCN1	GeneCards
KCNK3	GeneCards
NDUFAF4	GeneCards
COX15	GeneCards
MSH3	GeneCards
XK	GeneCards
NDUFAB1	GeneCards
BAK1	GeneCards
CEACAM6	GeneCards
FGFR1	GeneCards
MET	GeneCards
NSMCE2	GeneCards
CLCNKA	GeneCards
TET3	GeneCards
PCSK1	GeneCards
MAX	GeneCards
HOXA1	GeneCards
LONP1	GeneCards
UGT1A1	GeneCards
MIR200B	GeneCards
SYNGAP1	GeneCards
PTCD3	GeneCards
UBA1	GeneCards
SERPINF1	GeneCards
CSF3R	GeneCards
PUF60	GeneCards
OXT	GeneCards
CCL22	GeneCards
SHC1	GeneCards
TANGO2	GeneCards
PTPN22	GeneCards
HSD11B2	GeneCards
HERC2	GeneCards
ITGA3	GeneCards
BRCA1	GeneCards
CYP2D6	GeneCards
RUNX3	GeneCards
HNMT	GeneCards
EFNB1	GeneCards
PRKCB	GeneCards
C5AR1	GeneCards
CYP2C19	GeneCards
MIR132	GeneCards
BAZ1B	GeneCards
ABCD4	GeneCards
MIR331	GeneCards
BBS12	GeneCards
MT-ATP6	GeneCards
TLR1	GeneCards
SLC25A46	GeneCards
TEK	GeneCards
SMC3	GeneCards
MIR374A	GeneCards
IGH	GeneCards
DGUOK	GeneCards
GAREM2	GeneCards
SIX5	GeneCards
IPW	GeneCards
KCNA1	GeneCards
PDCD4	GeneCards
CCN4	GeneCards
FOXP3	GeneCards
BIRC5	GeneCards
GARS1	GeneCards
ALDH3A2	GeneCards
SELL	GeneCards
GNAS	GeneCards
DDB2	GeneCards
LTBP4	GeneCards
PYY	GeneCards
RBM10	GeneCards
GHR	GeneCards
DYSF	GeneCards
MT-ND4L	GeneCards
MTRR	GeneCards
FOXE1	GeneCards
BBS7	GeneCards
NCOR2	GeneCards
C2CD3	GeneCards
CD38	GeneCards
GLE1	GeneCards
TNFRSF9	GeneCards
RIPK4	GeneCards
CCNE1	GeneCards
NPC2	GeneCards
A2ML1	GeneCards
MIR151A	GeneCards
FOXM1	GeneCards
ALDH18A1	GeneCards
TPI1	GeneCards
MAOA	GeneCards
GATA6	GeneCards
PF4	GeneCards
MSH6	GeneCards
GYPC	GeneCards
NR2E3	GeneCards
ALDH2	GeneCards
AIRE	GeneCards
CDK8	GeneCards
LMOD3	GeneCards
EMP2	GeneCards
ALG2	GeneCards
GJB1	GeneCards
GRB2	GeneCards
TPM3	GeneCards
PIN1	GeneCards
ORM1	GeneCards
HSPD1	GeneCards
F2RL1	GeneCards
LCOR	GeneCards
RIN2	GeneCards
PRDM16	GeneCards
MIR378A	GeneCards
MIR99A	GeneCards
RPS28	GeneCards
PTK2	GeneCards
MIR128-2	GeneCards
COQ9	GeneCards
ATAD1	GeneCards
NDUFA8	GeneCards
MIR34B	GeneCards
SHBG	GeneCards
DNM1	GeneCards
UGT1A10	GeneCards
TUBB	GeneCards
MIR200C	GeneCards
USP7	GeneCards
ASCC1	GeneCards
CD82	GeneCards
MYH6	GeneCards
BCHE	GeneCards
MIR193A	GeneCards
SERPING1	GeneCards
NFKB2	GeneCards
HESX1	GeneCards
ARL13B	GeneCards
TNFRSF10A	GeneCards
KL	GeneCards
ORC1	GeneCards
GMPPA	GeneCards
IFT140	GeneCards
SON	GeneCards
IL24	GeneCards
NDUFS4	GeneCards
ID1	GeneCards
COL18A1	GeneCards
PIK3CB	GeneCards
TNXB	GeneCards
COX8A	GeneCards
NPM1	GeneCards
FUS	GeneCards
FKRP	GeneCards
TF	GeneCards
CLCN4	GeneCards
GCK	GeneCards
THRB	GeneCards
DNMT3B	GeneCards
MYBPC1	GeneCards
DNAH11	GeneCards
AQP2	GeneCards
ASS1	GeneCards
ALAD	GeneCards
TERC	GeneCards
F7	GeneCards
CNOT1	GeneCards
WDR19	GeneCards
UQCRC1	GeneCards
RSPH4A	GeneCards
EDNRA	GeneCards
NIPBL	GeneCards
MIR9-1	GeneCards
CEP120	GeneCards
POLG	GeneCards
POGZ	GeneCards
LUC7L2	GeneCards
RAG1	GeneCards
IRS1	GeneCards
GHRL	GeneCards
POMT1	GeneCards
ATR	GeneCards
IRF3	GeneCards
TACR1	GeneCards
LTBP1	GeneCards
RYR1	GeneCards
TRIP12	GeneCards
NDUFA2	GeneCards
FGF8	GeneCards
SLAMF1	GeneCards
DPYD	GeneCards
LRRK2	GeneCards
PPBP	GeneCards
HTR3A	GeneCards
LIF	GeneCards
OXTR	GeneCards
ACTC1	GeneCards
MAPK10	GeneCards
EPX	GeneCards
IKZF3	GeneCards
WNT3	GeneCards
EZR	GeneCards
NCAM1	GeneCards
MAN2B1	GeneCards
SLC25A21	GeneCards
OFD1	GeneCards
DYNC1H1	GeneCards
FGFR3	GeneCards
GLIS2	GeneCards
CGA	GeneCards
PTGES	GeneCards
BBS1	GeneCards
PEX16	GeneCards
FENDRR	GeneCards
FGF1	GeneCards
IL6R	GeneCards
CDC6	GeneCards
CST3	GeneCards
FUT4	GeneCards
CHI3L1	GeneCards
DBH	GeneCards
COX10	GeneCards
CRPPA	GeneCards
NDUFC1	GeneCards
CIITA	GeneCards
PKHD1	GeneCards
CRP	GeneCards
EPHA4	GeneCards
OCRL	GeneCards
FANCC	GeneCards
GLA	GeneCards
HSPA8	GeneCards
RARB	GeneCards
IMMT	GeneCards
PICALM	GeneCards
ZBTB20	GeneCards
NEU1	GeneCards
DPF2	GeneCards
ADAMTS2	GeneCards
NPHS1	GeneCards
HOXD13	GeneCards
KLHL7	GeneCards
XPC	GeneCards
GSTP1	GeneCards
TCF4	GeneCards
CCR3	GeneCards
MED12	GeneCards
SLC9A3	GeneCards
HBG2	GeneCards
FXN	GeneCards
STAT5A	GeneCards
AURKA	GeneCards
MIR122	GeneCards
ASAH1	GeneCards
PNPLA6	GeneCards
SPG11	GeneCards
AHI1	GeneCards
KIAA0586	GeneCards
DNAAF1	GeneCards
MT-ND2	GeneCards
MLN	GeneCards
CFAP92	GeneCards
IL18BP	GeneCards
SCN11A	GeneCards
GFI1	GeneCards
MIR182	GeneCards
FHL1	GeneCards
GATA1	GeneCards
TNFSF12	GeneCards
PBX1	GeneCards
MTR	GeneCards
KRT17	GeneCards
AHR	GeneCards
DHFR	GeneCards
ALPP	GeneCards
EIF4A3	GeneCards
CHMP2B	GeneCards
ACO2	GeneCards
TTC21B	GeneCards
TPMT	GeneCards
RBM6	GeneCards
IQSEC2	GeneCards
MIR144	GeneCards
IL23R	GeneCards
MEGF10	GeneCards
MIR181A2	GeneCards
KLF4	GeneCards
GAA	GeneCards
MYOD1	GeneCards
OPA3	GeneCards
PRDM12	GeneCards
IFI27	GeneCards
SCN1A	GeneCards
HP	GeneCards
BTK	GeneCards
TRAF7	GeneCards
PIGL	GeneCards
ECE1	GeneCards
TRAF2	GeneCards
IDS	GeneCards
HCK	GeneCards
DNAJC30	GeneCards
MIR29B1	GeneCards
DISC1	GeneCards
NIPAL4	GeneCards
BMP6	GeneCards
TRB	GeneCards
DCX	GeneCards
NPPA	GeneCards
MOGS	GeneCards
LAMB3	GeneCards
TBX21	GeneCards
CCL26	GeneCards
RTEL1	GeneCards
ETFA	GeneCards
MIR485	GeneCards
BRD4	GeneCards
SNAI1	GeneCards
NDUFA13	GeneCards
CYP19A1	GeneCards
CCAT1	GeneCards
PLA2G6	GeneCards
CYP3A5	GeneCards
SOX9	GeneCards
ZFPM2	GeneCards
DEFB4A	GeneCards
CUL4B	GeneCards
GC	GeneCards
CENPJ	GeneCards
MIR424	GeneCards
PDGFRB	GeneCards
ADRB1	GeneCards
NPRL2	GeneCards
MIR452	GeneCards
MUC5B	GeneCards
DCTN1	GeneCards
PXN	GeneCards
COG4	GeneCards
C1QBP	GeneCards
FANCA	GeneCards
NDUFB8	GeneCards
PDSS1	GeneCards
IKBKG	GeneCards
TCF21	GeneCards
MEIS1	GeneCards
NDUFAF8	GeneCards
NSD1	GeneCards
GLDN	GeneCards
EDAR	GeneCards
C5	GeneCards
SLC2A10	GeneCards
EGF	GeneCards
ANKRD26	GeneCards
GNRH1	GeneCards
CMA1	GeneCards
MIR7-1	GeneCards
FYN	GeneCards
ERCC1	GeneCards
CAV3	GeneCards
KCND3	GeneCards
AGO2	GeneCards
CREBBP	GeneCards
ITGB1	GeneCards
LORICRIN	GeneCards
TAFAZZIN	GeneCards
PARK7	GeneCards
RPN1	GeneCards
KLF2	GeneCards
TUBA1A	GeneCards
ABCC2	GeneCards
TTC12	GeneCards
NOP10	GeneCards
IFT43	GeneCards
NAIP	GeneCards
LRRC56	GeneCards
SOX10	GeneCards
RARS2	GeneCards
IRF7	GeneCards
SET	GeneCards
UGT1A8	GeneCards
THY1	GeneCards
LRBA	GeneCards
KIT	GeneCards
KRT8	GeneCards
SHH	GeneCards
THPO	GeneCards
UCA1	GeneCards
MIR210	GeneCards
FHIT	GeneCards
PPOX	GeneCards
JAK2	GeneCards
ACADVL	GeneCards
ATG7	GeneCards
CD8A	GeneCards
GTF2H5	GeneCards
MIR542	GeneCards
MED25	GeneCards
MYCL	GeneCards
GLI1	GeneCards
MIR17HG	GeneCards
TNNT2	GeneCards
DGCR5	GeneCards
GRIA1	GeneCards
XIAP	GeneCards
WNT5A	GeneCards
TRPA1	GeneCards
RPS29	GeneCards
GNS	GeneCards
ATP6V0A2	GeneCards
IFNAR1	GeneCards
ENO2	GeneCards
PEX26	GeneCards
SDHD	GeneCards
BMP7	GeneCards
OSM	GeneCards
B2M	GeneCards
CFHR1	GeneCards
NF1	GeneCards
MIRLET7E	GeneCards
LRP5	GeneCards
OLR1	GeneCards
NEFL	GeneCards
CD2	GeneCards
CBS	GeneCards
COX7B	GeneCards
DYNC2I2	GeneCards
MIR221	GeneCards
KIAA0753	GeneCards
MIR183	GeneCards
ATXN7	GeneCards
MIR141	GeneCards
TLR5	GeneCards
FCGR3A	GeneCards
CLIP2	GeneCards
CYP2C9	GeneCards
DNMT3A	GeneCards
FSHR	GeneCards
GAS8	GeneCards
NT5E	GeneCards
NPY	GeneCards
GAD2	GeneCards
ITGA6	GeneCards
BAG3	GeneCards
SLC16A2	GeneCards
FOXRED1	GeneCards
CA5A	GeneCards
RUNX1T1	GeneCards
IGFBP2	GeneCards
NOTCH2	GeneCards
PRKDC	GeneCards
CEP164	GeneCards
MSR1	GeneCards
EXOSC3	GeneCards
ATXN2	GeneCards
USP18	GeneCards
PSMD12	GeneCards
SMCHD1	GeneCards
CLEC4M	GeneCards
S100B	GeneCards
TUSC7	GeneCards
MGP	GeneCards
PCDH15	GeneCards
SOST	GeneCards
GYPA	GeneCards
TAC1	GeneCards
ESR1	GeneCards
GABRG3	GeneCards
TRAIP	GeneCards
SLCO1B1	GeneCards
KCNN3	GeneCards
SST	GeneCards
FKBP5	GeneCards
ERCC8	GeneCards
BCS1L	GeneCards
PRF1	GeneCards
CDK4	GeneCards
GCH1	GeneCards
FLI1	GeneCards
TYMS	GeneCards
SCNN1B	GeneCards
ALG9	GeneCards
H4C16	GeneCards
APTX	GeneCards
MXRA5	GeneCards
IBA57	GeneCards
RAPSN	GeneCards
PDE4D	GeneCards
SNCA	GeneCards
FASTKD2	GeneCards
HRAS	GeneCards
NDUFAF1	GeneCards
MAP2K4	GeneCards
SF3B2	GeneCards
MIR361	GeneCards
CDKN2B	GeneCards
BCL6	GeneCards
TXNL4A	GeneCards
DHCR7	GeneCards
PSMB8	GeneCards
FGFR4	GeneCards
SLC19A1	GeneCards
XRCC1	GeneCards
LAMA1	GeneCards
TMPRSS11D	GeneCards
APOL1	GeneCards
ENPP2	GeneCards
PIK3CD	GeneCards
SETBP1	GeneCards
ACAN	GeneCards
AREG	GeneCards
LIPT1	GeneCards
ITGA2	GeneCards
MME	GeneCards
APEX1	GeneCards
GRIN2A	GeneCards
TUFM	GeneCards
SCARF2	GeneCards
GAST	GeneCards
NRXN1	GeneCards
NTS	GeneCards
DNAAF5	GeneCards
ARSA	GeneCards
TNFRSF8	GeneCards
BIRC2	GeneCards
CERS3	GeneCards
FOXE3	GeneCards
SOCS3	GeneCards
CCNA2	GeneCards
PLS3	GeneCards
IL10RB	GeneCards
DAG1	GeneCards
WWOX	GeneCards
ARID1B	GeneCards
PLOD2	GeneCards
CHIT1	GeneCards
ISCA1	GeneCards
RPS24	GeneCards
PI3	GeneCards
MT-ND6	GeneCards
MAVS	GeneCards
NIPA2	GeneCards
VCP	GeneCards
NKX2-1	GeneCards
SLC35A1	GeneCards
LAMA3	GeneCards
SDHAF1	GeneCards
ARID2	GeneCards
SLC11A1	GeneCards
LFNG	GeneCards
PCYT1B	GeneCards
DYNC2I1	GeneCards
SH3GL1	GeneCards
MIR21	GeneCards
PIP5K1C	GeneCards
KIF1B	GeneCards
PIGT	GeneCards
MT-TS1	GeneCards
NDUFV2	GeneCards
CLCNKB	GeneCards
NNMT	GeneCards
NEK10	GeneCards
NPHP3	GeneCards
TSEN54	GeneCards
MMP1	GeneCards
HLA-DQA1	GeneCards
HYAL2	GeneCards
FKTN	GeneCards
ZMYND10	GeneCards
CRTAP	GeneCards
MMP12	GeneCards
TK2	GeneCards
PEX11B	GeneCards
STMN1	GeneCards
HABP2	GeneCards
REEP1	GeneCards
MIR326	GeneCards
POGLUT1	GeneCards
MKKS	GeneCards
PTGER4	GeneCards
CCR7	GeneCards
KCNQ1	GeneCards
EPCAM	GeneCards
WEE1	GeneCards
SSR4	GeneCards
SFTPA1	GeneCards
ZBTB24	GeneCards
RHO	GeneCards
PLXND1	GeneCards
BANF1	GeneCards
MIR338	GeneCards
CR1	GeneCards
FAM13A	GeneCards
HMBS	GeneCards
TOR1A	GeneCards
BSG	GeneCards
SLC25A15	GeneCards
GADD45B	GeneCards
TRPV1	GeneCards
MIR152	GeneCards
PWAR1	GeneCards
UCP2	GeneCards
MIR28	GeneCards
WFS1	GeneCards
RIGI	GeneCards
TRIP11	GeneCards
MIRLET7A1	GeneCards
NDUFB3	GeneCards
SLC22A5	GeneCards
MIR335	GeneCards
SYP	GeneCards
POT1	GeneCards
CCR4	GeneCards
PTPRC	GeneCards
COX6A1	GeneCards
NDE1	GeneCards
SNAP29	GeneCards
HMGCR	GeneCards
HACD1	GeneCards
YBX1	GeneCards
ANXA2	GeneCards
HLCS	GeneCards
IFT74	GeneCards
FH	GeneCards
TBC1D24	GeneCards
INSL6	GeneCards
NR3C2	GeneCards
MIR134	GeneCards
C4B	GeneCards
BLNK	GeneCards
INPPL1	GeneCards
CACNA1C	GeneCards
IHH	GeneCards
COL9A3	GeneCards
FIG4	GeneCards
IGHMBP2	GeneCards
MCCC1	GeneCards
COL9A1	GeneCards
GGT1	GeneCards
AMPH	GeneCards
EIF2AK2	GeneCards
WNT1	GeneCards
VAC14	GeneCards
IDO1	GeneCards
HNRNPH1	GeneCards
COL4A2	GeneCards
SRCAP	GeneCards
OBSL1	GeneCards
C1S	GeneCards
TTC19	GeneCards
GFPT1	GeneCards
PRKN	GeneCards
MIR195	GeneCards
NECTIN1	GeneCards
INS	GeneCards
HTR1A	GeneCards
NLGN4X	GeneCards
EXT1	GeneCards
HOTAIR	GeneCards
EIF4E	GeneCards
SMAD2	GeneCards
NXN	GeneCards
ADA2	GeneCards
KMT2D	GeneCards
BGLAP	GeneCards
CRHR1	GeneCards
MIR590	GeneCards
TRAF6	GeneCards
CCL18	GeneCards
CCR6	GeneCards
AXL	GeneCards
CRABP2	GeneCards
COL11A2	GeneCards
RINT1	GeneCards
ASL	GeneCards
DNAH7	GeneCards
GATA3	GeneCards
BRCA2	GeneCards
ACADM	GeneCards
FMR1	GeneCards
ARX	GeneCards
TUBB2B	GeneCards
BBS9	GeneCards
CXCR1	GeneCards
C9orf72	GeneCards
SLC12A3	GeneCards
MPZ	GeneCards
FLCN	GeneCards
NAMPT	GeneCards
SLC5A7	GeneCards
ERCC4	GeneCards
MMP8	GeneCards
FOXC2	GeneCards
MIR34A	GeneCards
ACY1	GeneCards
HDAC4	GeneCards
GLRA1	GeneCards
IFT172	GeneCards
CTNS	GeneCards
GDNF	GeneCards
STK36	GeneCards
MIR497	GeneCards
MIR222	GeneCards
NDUFB7	GeneCards
MYO9A	GeneCards
NTRK2	GeneCards
SP110	GeneCards
CRH	GeneCards
SH3TC2	GeneCards
AGRN	GeneCards
PRSS2	GeneCards
CEP290	GeneCards
ACP5	GeneCards
TBCE	GeneCards
LIAS	GeneCards
PLCB4	GeneCards
TFB1M	GeneCards
PGF	GeneCards
SAG	GeneCards
CHD7	GeneCards
HNRNPA2B1	GeneCards
RNF216	GeneCards
DPM1	GeneCards
RPS10	GeneCards
TSC1	GeneCards
MIR214	GeneCards
DKK3	GeneCards
TMEM70	GeneCards
EFL1	GeneCards
ALOX5AP	GeneCards
NHLRC2	GeneCards
SBF1	GeneCards
POSTN	GeneCards
PLA2G1B	GeneCards
POLR1B	GeneCards
FTO	GeneCards
MIR532	GeneCards
ATP13A2	GeneCards
NAGLU	GeneCards
SPI1	GeneCards
TREM2	GeneCards
MMP14	GeneCards
FMO3	GeneCards
UBE3B	GeneCards
MDM2	GeneCards
KCNK9	GeneCards
TAP2	GeneCards
TNFSF11	GeneCards
SPOP	GeneCards
RPGRIP1L	GeneCards
AKT2	GeneCards
SLC25A4	GeneCards
SFTA3	GeneCards
TYK2	GeneCards
NDRG1	GeneCards
ADAM28	GeneCards
GBE1	GeneCards
TCL1A	GeneCards
CLASP1	GeneCards
MAPKAPK3	GeneCards
MIR130A	GeneCards
FSCN1	GeneCards
BCR	GeneCards
CXCR3	GeneCards
CYSLTR1	GeneCards
MIR154	GeneCards
GPR161	GeneCards
MIRLET7B	GeneCards
CTLA4	GeneCards
PURA	GeneCards
MCM7	GeneCards
RPL15	GeneCards
TRAPPC11	GeneCards
APOH	GeneCards
ERBB2	GeneCards
TLR7	GeneCards
NPHS2	GeneCards
CEACAM5	GeneCards
NDUFV1	GeneCards
LGALS3	GeneCards
RAB3GAP2	GeneCards
RASA2	GeneCards
CLEC7A	GeneCards
PDGFA	GeneCards
IL17F	GeneCards
CDT1	GeneCards
SELPLG	GeneCards
CD28	GeneCards
SMARCA4	GeneCards
DIABLO	GeneCards
NAT2	GeneCards
PIGQ	GeneCards
MASP2	GeneCards
MIR30D	GeneCards
BBS4	GeneCards
KRT20	GeneCards
HS6ST1	GeneCards
HLA-DPB1	GeneCards
STAT5B	GeneCards
XIST	GeneCards
KIFBP	GeneCards
HSD3B2	GeneCards
GNE	GeneCards
MIR93	GeneCards
SCT	GeneCards
SLC39A13	GeneCards
SLC35A2	GeneCards
GABRD	GeneCards
KRT16	GeneCards
TBL1XR1	GeneCards
TRPV4	GeneCards
NEK8	GeneCards
PROKR2	GeneCards
PDE5A	GeneCards
RBBP8	GeneCards
HDAC8	GeneCards
SRP54	GeneCards
MIR199B	GeneCards
F10	GeneCards
DNAAF2	GeneCards
SCN1B	GeneCards
COMP	GeneCards
STAR	GeneCards
F2R	GeneCards
RTEL1-TNFRSF6B	GeneCards
FARSA	GeneCards
MIR339	GeneCards
MTAP	GeneCards
H2AX	GeneCards
ABL1	GeneCards
NCOR1	GeneCards
MIR143	GeneCards
AFDN	GeneCards
GZMB	GeneCards
FCGR3B	GeneCards
SLC6A8	GeneCards
HPDL	GeneCards
CDC45	GeneCards
DNAJC21	GeneCards
DAXX	GeneCards
HLA-G	GeneCards
LRP2	GeneCards
PRX	GeneCards
SLC25A20	GeneCards
NDUFA1	GeneCards
SYNE1	GeneCards
MYCN	GeneCards
MBTPS2	GeneCards
MVK	GeneCards
RBM5	GeneCards
DPP9	GeneCards
PIGY	GeneCards
GUSB	GeneCards
EXTL3	GeneCards
PMPCB	GeneCards
CRELD1	GeneCards
DNM2	GeneCards
EHMT1	GeneCards
CHEK2	GeneCards
FBP1	GeneCards
DRD4	GeneCards
PLA2G7	GeneCards
TERT	GeneCards
FUCA1	GeneCards
CD247	GeneCards
MIR106A	GeneCards
KRT18	GeneCards
CEP19	GeneCards
GRPR	GeneCards
SOCS1	GeneCards
MIR155	GeneCards
IL17RA	GeneCards
MCM4	GeneCards
STRA6	GeneCards
MGAT3-AS1	GeneCards
IFT88	GeneCards
SLC26A2	GeneCards
PTH	GeneCards
TARDBP	GeneCards
RB1	GeneCards
B3GALT6	GeneCards
MT-ND5	GeneCards
MTO1	GeneCards
PTPN6	GeneCards
HADHB	GeneCards
MPV17	GeneCards
MIR25	GeneCards
SAA1	GeneCards
SHOC2	GeneCards
HBB	GeneCards
FBXW7	GeneCards
SRC	GeneCards
NTNG1	GeneCards
KNG1	GeneCards
ITGAX	GeneCards
CASR	GeneCards
MIR30E	GeneCards
CANT1	GeneCards
CDK2	GeneCards
NABP1	GeneCards
TFAP2A	GeneCards
NFS1	GeneCards
NUP107	GeneCards
PGR	GeneCards
RUNX2	GeneCards
MT-CO1	GeneCards
LRP12	GeneCards
FGF10	GeneCards
KRT7	GeneCards
ODC1	GeneCards
MIR296	GeneCards
PHEX	GeneCards
TFPI	GeneCards
MECOM	GeneCards
E2F2	GeneCards
ATP5MK	GeneCards
BBS5	GeneCards
IFT27	GeneCards
CYP17A1	GeneCards
MIR22	GeneCards
ESCO2	GeneCards
CD209	GeneCards
KRT19	GeneCards
GABRB3	GeneCards
SBDS	GeneCards
ENO1	GeneCards
SGSH	GeneCards
MAN1B1	GeneCards
FECH	GeneCards
PLG	GeneCards
SLC7A7	GeneCards
TACR3	GeneCards
IL10RA	GeneCards
SLC35C1	GeneCards
KIF1A	GeneCards
IL36RN	GeneCards
COL4A1	GeneCards
VCAN	GeneCards
NDUFB11	GeneCards
UBE2A	GeneCards
GRM7	GeneCards
MKI67	GeneCards
PANK2	GeneCards
DNAH8	GeneCards
GLS	GeneCards
TSLP	GeneCards
STS	GeneCards
SLC1A3	GeneCards
IL4R	GeneCards
GLI2	GeneCards
BTNL2	GeneCards
TGIF1	GeneCards
PEX5	GeneCards
SCO2	GeneCards
SFTPC	GeneCards
BCL7B	GeneCards
SPAG1	GeneCards
RPL35A	GeneCards
JUP	GeneCards
MIR140	GeneCards
STK11	GeneCards
MX1	GeneCards
SAA4	GeneCards
LOX	GeneCards
MIR138-1	GeneCards
MIR455	GeneCards
COA8	GeneCards
PRDM5	GeneCards
NLRP1	GeneCards
LOC113664106	GeneCards
LAMB2	GeneCards
HNF1B	GeneCards
ACP1	GeneCards
CCN1	GeneCards
SIGLEC5	GeneCards
ZMYM2	GeneCards
UMOD	GeneCards
PDCD1	GeneCards
GTF2I	GeneCards
ZNF469	GeneCards
DYNC2LI1	GeneCards
LPL	GeneCards
LAMP2	GeneCards
DGKE	GeneCards
MARS1	GeneCards
CUL7	GeneCards
LAMC2	GeneCards
CPOX	GeneCards
TIRAP	GeneCards
RASA1	GeneCards
ADAM17	GeneCards
GABRG2	GeneCards
CTNND1	GeneCards
CHRNA3	GeneCards
F5	GeneCards
TPM2	GeneCards
ITCH	GeneCards
MBP	GeneCards
CPS1	GeneCards
NCOA2	GeneCards
GATA2	GeneCards
EXO1	GeneCards
MESD	GeneCards
GPC3	GeneCards
PIK3R1	GeneCards
GRP	GeneCards
CDKN2C	GeneCards
MAF	GeneCards
PDGFRA	GeneCards
STXBP1	GeneCards
TET1	GeneCards
DMD	GeneCards
MIR181C	GeneCards
ADM	GeneCards
STAMBP	GeneCards
NDUFA12	GeneCards
PREPL	GeneCards
MIR150	GeneCards
CD22	GeneCards
TTC14	GeneCards
EIF4H	GeneCards
CD47	GeneCards
OTC	GeneCards
MIR199A1	GeneCards
KCNQ3	GeneCards
ABCB11	GeneCards
SLC22A12	GeneCards
RPL11	GeneCards
ETFB	GeneCards
TRPV3	GeneCards
IFIH1	GeneCards
ASXL1	GeneCards
HADHA	GeneCards
IDH1	GeneCards
SNHG1	GeneCards
XRCC5	GeneCards
AHSG	GeneCards
POU5F1	GeneCards
SELENON	GeneCards
HDAC1	GeneCards
BMI1	GeneCards
MASP1	GeneCards
ABCC1	GeneCards
BOLA3	GeneCards
PPP1R21	GeneCards
SEMA3F	GeneCards
MIR27B	GeneCards
LOC107133510	GeneCards
HAX1	GeneCards
REN	GeneCards
NEK9	GeneCards
ACTA1	GeneCards
CHRM3	GeneCards
GABBR2	GeneCards
TBX22	GeneCards
WRAP53	GeneCards
CDKL5	GeneCards
GNB1	GeneCards
CFAP300	GeneCards
COQ4	GeneCards
IGF2R	GeneCards
ADNP	GeneCards
BTD	GeneCards
METTL27	GeneCards
POMC	GeneCards
ZMPSTE24	GeneCards
IL9	GeneCards
UBE3A	GeneCards
NLRP12	GeneCards
ALAS2	GeneCards
DNM1L	GeneCards
ORC4	GeneCards
CNOT3	GeneCards
TOLLIP	GeneCards
DEK	GeneCards
DNAL1	GeneCards
TAF15	GeneCards
ALMS1	GeneCards
TERF1	GeneCards
CEACAM1	GeneCards
HAMP	GeneCards
DCN	GeneCards
DNTT	GeneCards
DLK1	GeneCards
NINJ1	GeneCards
COL11A1	GeneCards
HTR2A	GeneCards
SFXN4	GeneCards
EPAS1	GeneCards
SCNN1G	GeneCards
S100A12	GeneCards
MLH1	GeneCards
YARS1	GeneCards
TREM1	GeneCards
IFNAR2	GeneCards
HLA-C	GeneCards
SLC13A3	GeneCards
SCN10A	GeneCards
C11orf65	GeneCards
LPIN1	GeneCards
MKS1	GeneCards
CX3CR1	GeneCards
GAPDH	GeneCards
PLP1	GeneCards
PMP22	GeneCards
APC	GeneCards
TLR2	GeneCards
P2RX7	GeneCards
CRLF2	GeneCards
GALNS	GeneCards
LIMK1	GeneCards
KCNJ11	GeneCards
FAM20C	GeneCards
TSFM	GeneCards
ABCC8	GeneCards
TBX6	GeneCards
MMP19	GeneCards
BPI	GeneCards
IL18R1	GeneCards
LYRM7	GeneCards
GLB1	GeneCards
BCL10	GeneCards
SERPINA3	GeneCards
NDUFS3	GeneCards
HCRT	GeneCards
REG3A	GeneCards
AUTS2	GeneCards
MMP10	GeneCards
FBXL4	GeneCards
TRG	GeneCards
GBA1	GeneCards
NFU1	GeneCards
ALG1	GeneCards
COL27A1	GeneCards
MT-TV	GeneCards
HAVCR2	GeneCards
FLT4	GeneCards
MIR367	GeneCards
NME1	GeneCards
CEBPE	GeneCards
ESR2	GeneCards
OLIG2	GeneCards
AGTR2	GeneCards
MESP2	GeneCards
MIR483	GeneCards
ADAMTSL1	GeneCards
DNAI2	GeneCards
LACTB	GeneCards
CSNK2A1	GeneCards
FKBP6	GeneCards
LPCAT1	GeneCards
BRAF	GeneCards
TWIST1	GeneCards
EPO	GeneCards
APRT	GeneCards
PAX5	GeneCards
PEBP1	GeneCards
HNRNPA1	GeneCards
AKT3	GeneCards
SIK1	GeneCards
IL1R1	GeneCards
LTBP3	GeneCards
H4C1	GeneCards
KCNJ8	GeneCards
ITIH4	GeneCards
ERCC6L2	GeneCards
TCOF1	GeneCards
MIR708	GeneCards
KMT2C	GeneCards
USP8	GeneCards
SLC17A5	GeneCards
HGF	GeneCards
EPHB4	GeneCards
SOX18	GeneCards
TYMP	GeneCards
MIR29A	GeneCards
ARID1A	GeneCards
ITGAL	GeneCards
PDE4A	GeneCards
SATB1	GeneCards
PPM1D	GeneCards
NDUFA5	GeneCards
SCO1	GeneCards
SOX2	GeneCards
FLVCR2	GeneCards
SDHA	GeneCards
CYP1B1	GeneCards
ALPL	GeneCards
SMAD6	GeneCards
COMT	GeneCards
CHST3	GeneCards
SAT1	GeneCards
MIR26A1	GeneCards
XYLT1	GeneCards
LOC106627981	GeneCards
ROS1	GeneCards
MT-TL1	GeneCards
COLQ	GeneCards
SCARF1	GeneCards
SLC6A3	GeneCards
APC2	GeneCards
UQCRC2	GeneCards
TTC26	GeneCards
STT3B	GeneCards
B3GNT2	GeneCards
ISCA2	GeneCards
FANCG	GeneCards
CHRNA7	GeneCards
AVP	GeneCards
MEF2C	GeneCards
HOPX	GeneCards
DYNLT2B	GeneCards
LBR	GeneCards
CBFA2T3	GeneCards
FAM50A	GeneCards
RNASEH1	GeneCards
AFF3	GeneCards
IL2RG	GeneCards
MYB	GeneCards
CDC25A	GeneCards
PLOD1	GeneCards
KARS1	GeneCards
CLPB	GeneCards
ERGIC1	GeneCards
ERBB4	GeneCards
SLC30A9	GeneCards
GPHN	GeneCards
DNASE1	GeneCards
ZAP70	GeneCards
SLC6A2	GeneCards
LPP	GeneCards
SPINK1	GeneCards
NBAS	GeneCards
MIR193B	GeneCards
IL12RB1	GeneCards
ATRX	GeneCards
CCNA1	GeneCards
NBN	GeneCards
MIR31	GeneCards
BID	GeneCards
NMB	GeneCards
COX5A	GeneCards
AIFM1	GeneCards
SEC24D	GeneCards
MIR146A	GeneCards
SOS1	GeneCards
TGFB2	GeneCards
MDFIC	GeneCards
RAC1	GeneCards
CHRNE	GeneCards
LAMA2	GeneCards
MIR328	GeneCards
AFF1	GeneCards
ANXA1	GeneCards
C1R	GeneCards
ATP1A3	GeneCards
POLR1C	GeneCards
SETD2	GeneCards
MATR3	GeneCards
TICAM1	GeneCards
MIR451A	GeneCards
MMP13	GeneCards
MTM1	GeneCards
SLC6A4	GeneCards
SMARCC2	GeneCards
NLRC4	GeneCards
NDUFA6	GeneCards
NDUFAF3	GeneCards
GNAI3	GeneCards
NAXE	GeneCards
POLG2	GeneCards
CD4	GeneCards
DSP	GeneCards
LOC110006319	GeneCards
NUP214	GeneCards
TUG1	GeneCards
PTK2B	GeneCards
SDCCAG8	GeneCards
SDHB	GeneCards
IRF2BP2	GeneCards
MBL2	GeneCards
SOX4	GeneCards
NGF	GeneCards
PRAM1	GeneCards
SH2D1A	GeneCards
MUSK	GeneCards
COX14	GeneCards
ALOX5	GeneCards
NRP1	GeneCards
CDH13	GeneCards
PKD1	GeneCards
LUCAT1	GeneCards
CD33	GeneCards
AMBP	GeneCards
RAB3GAP1	GeneCards
SMPD4	GeneCards
AKR1B10	GeneCards
EXT2	GeneCards
RARS1	GeneCards
FARSB	GeneCards
ACVRL1	GeneCards
MECP2	GeneCards
RXRA	GeneCards
DEFB1	GeneCards
MIR30A	GeneCards
NOS1	GeneCards
TBK1	GeneCards
PKD2	GeneCards
PRL	GeneCards
TIMP3	GeneCards
STAG2	GeneCards
EPHA2	GeneCards
MIR18A	GeneCards
CLCN6	GeneCards
MIR98	GeneCards
MIR149	GeneCards
CD55	GeneCards
LARS1	GeneCards
PROK2	GeneCards
SCYL1	GeneCards
MTHFR	GeneCards
AARS1	GeneCards
SLC18A3	GeneCards
PTPN11	GeneCards
KDM5C	GeneCards
YARS2	GeneCards
TRDN	GeneCards
TBX5	GeneCards
CARD11	GeneCards
UCHL1	GeneCards
CDK12	GeneCards
CCDC39	GeneCards
GJB6	GeneCards
MRPS34	GeneCards
PLK1	GeneCards
PLCG1	GeneCards
NPHP1	GeneCards
COQ7	GeneCards
FBN2	GeneCards
NDUFA11	GeneCards
SYT2	GeneCards
P3H1	GeneCards
MIR148A	GeneCards
MIR204	GeneCards
DPP4	GeneCards
DICER1	GeneCards
NPPB	GeneCards
SKP1	GeneCards
MIR19A	GeneCards
IKZF1	GeneCards
PAFAH1B1	GeneCards
H2AC18	GeneCards
MT-TN	GeneCards
KCNA2	GeneCards
IFNA2	GeneCards
SRPRA	GeneCards
LGALS1	GeneCards
ALK	GeneCards
EZH2	GeneCards
DOCK8	GeneCards
SLC25A1	GeneCards
TRPV6	GeneCards
ATP11A	GeneCards
VAMP1	GeneCards
MUC16	GeneCards
EVC2	GeneCards
YWHAE	GeneCards
MIR127	GeneCards
PON1	GeneCards
ATP4A	GeneCards
UBA7	GeneCards
CDKN1B	GeneCards
PRKCI	GeneCards
MRPL12	GeneCards
SOD3	GeneCards
LOC106099062	GeneCards
MIR192	GeneCards
NDUFS8	GeneCards
CYP21A2	GeneCards
MIR223	GeneCards
SEMA3E	GeneCards
CSF1	GeneCards
PQBP1	GeneCards
SMARCB1	GeneCards
PGAP2	GeneCards
CRYAB	GeneCards
CHEK1	GeneCards
COPA	GeneCards
CKB	GeneCards
MUC1	GeneCards
IPO8	GeneCards
SKP2	GeneCards
PTHLH	GeneCards
MIR27A	GeneCards
TNFRSF11B	GeneCards
ACOX1	GeneCards
COA6	GeneCards
MUC7	GeneCards
MYH9	GeneCards
LBP	GeneCards
MIR10A	GeneCards
NCF2	GeneCards
IDH2	GeneCards
SLC12A6	GeneCards
MIR320A	GeneCards
XRCC6	GeneCards
SOS2	GeneCards
ADORA2A	GeneCards
CDKN2B-AS1	GeneCards
KCNH2	GeneCards
STIM1	GeneCards
PIGV	GeneCards
TRAF3	GeneCards
CXCR2	GeneCards
TMEM237	GeneCards
APBB1	GeneCards
ALG14	GeneCards
F9	GeneCards
KNSTRN	GeneCards
MKRN3-AS1	GeneCards
RPS27A	GeneCards
MIRLET7C	GeneCards
STAT4	GeneCards
TNNI3	GeneCards
MIR181B1	GeneCards
CD40	GeneCards
SGCB	GeneCards
E2F1	GeneCards
PLCB3	GeneCards
APOB	GeneCards
EFTUD2	GeneCards
CFH	GeneCards
TAP1	GeneCards
TSC2	GeneCards
MIR23A	GeneCards
ETS2	GeneCards
CS	GeneCards
IGFBP7	GeneCards
PRDX1	GeneCards
SCN4A	GeneCards
CDH2	GeneCards
FGB	GeneCards
NDUFAF6	GeneCards
MIR203A	GeneCards
FLNC	GeneCards
MOG	GeneCards
MYOT	GeneCards
KRAS	GeneCards
ZRSR2	GeneCards
SPTAN1	GeneCards
ATP7A	GeneCards
MIR137	GeneCards
CDX2	GeneCards
EMG1	GeneCards
C4A	GeneCards
AQP4	GeneCards
BAG1	GeneCards
MIR615	GeneCards
JAG1	GeneCards
CHGA	GeneCards
CACNA1B	GeneCards
HSPA4	GeneCards
DMPK	GeneCards
PAPPA	GeneCards
RHOA	GeneCards
NEAT1	GeneCards
SMC1A	GeneCards
CCL7	GeneCards
TP73	GeneCards
CALCA	GeneCards
PRKCD	GeneCards
IFT80	GeneCards
DLL1	GeneCards
SERPINA1	GeneCards
ANTXR2	GeneCards
COL4A3	GeneCards
MIR92A1	GeneCards
PPIG	GeneCards
PEX1	GeneCards
RET	GeneCards
MAPT	GeneCards
RPSA	GeneCards
TAPBP	GeneCards
RUNX1	GeneCards
PRKAA1	GeneCards
MID1	GeneCards
ALDH1A2	GeneCards
HLA-DQB1	GeneCards
MT-CYB	GeneCards
NRAS	GeneCards
MIR574	GeneCards
ALG12	GeneCards
CCL17	GeneCards
SLC12A2	GeneCards
HDAC9	GeneCards
OGG1	GeneCards
DYM	GeneCards
AFP	GeneCards
IREB2	GeneCards
MSX2	GeneCards
EXOSC9	GeneCards
CNR1	GeneCards
ABCC4	GeneCards
PHOX2B	GeneCards
TAMM41	GeneCards
USP9X	GeneCards
FTL	GeneCards
KLF6	GeneCards
PIK3R3	GeneCards
SLC34A1	GeneCards
NR3C1	GeneCards
NR5A1	GeneCards
FCN2	GeneCards
PIK3C2A	GeneCards
NPAP1	GeneCards
HUWE1	GeneCards
POLA1	GeneCards
ASPH	GeneCards
MT-ATP8	GeneCards
YY1	GeneCards
CDCA7L	GeneCards
LEPR	GeneCards
RRAS2	GeneCards
LTBP2	GeneCards
GH-LCR	GeneCards
MIR124-1	GeneCards
CYP2A6	GeneCards
NDUFS2	GeneCards
SLC19A3	GeneCards
STUB1	GeneCards
KDM1A	GeneCards
WT1	GeneCards
SLC25A22	GeneCards
ILK	GeneCards
KCNQ1OT1	GeneCards
AOC3	GeneCards
PITX2	GeneCards
FABP3	GeneCards
MYBPC3	GeneCards
MYPN	GeneCards
SIM1	GeneCards
C17orf107	GeneCards
NHP2	GeneCards
SATB2	GeneCards
CDK6	GeneCards
EIF2S3	GeneCards
SLC25A13	GeneCards
SNAP25	GeneCards
SMPD1	GeneCards
COL6A2	GeneCards
TH	GeneCards
MTFMT	GeneCards
MT-TL2	GeneCards
LCK	GeneCards
AFF4	GeneCards
RAF1	GeneCards
MAP3K8	GeneCards
MIR19B2	GeneCards
ALG13	GeneCards
TRD	GeneCards
KLRK1	GeneCards
FURIN	GeneCards
UQCRFS1	GeneCards
GSN	GeneCards
EGR2	GeneCards
HLA-DPA1	GeneCards
CCR2	GeneCards
MYH3	GeneCards
RSPH1	GeneCards
BLM	GeneCards
ANK2	GeneCards
NALCN	GeneCards
PLA2G4A	GeneCards
DRD2	GeneCards
FKBP10	GeneCards
UNC13D	GeneCards
SMAD7	GeneCards
H4C5	GeneCards
VLDLR	GeneCards
CFHR4	GeneCards
VEGFC	GeneCards
MAP2K2	GeneCards
INVS	GeneCards
ZBTB16	GeneCards
PDGFB	GeneCards
ELN	GeneCards
MIR32	GeneCards
CALR	GeneCards
PHOX2A	GeneCards
DES	GeneCards
FGFR2	GeneCards
ABCC3	GeneCards
ITGAV	GeneCards
XRCC3	GeneCards
GDAP1	GeneCards
SAMD9L	GeneCards
CSF3	GeneCards
MMACHC	GeneCards
REV3L	GeneCards
PRKAR1A	GeneCards
HLA-A	GeneCards
TNNI2	GeneCards
CD7	GeneCards
EDNRB	GeneCards
LDHA	GeneCards
CD27	GeneCards
PEX13	GeneCards
MIR106B	GeneCards
GRIN2B	GeneCards
CHUK	GeneCards
CHAT	GeneCards
NR1H2	GeneCards
PDPK1	GeneCards
CD226	GeneCards
TCTN1	GeneCards
CD2AP	GeneCards
CCL20	GeneCards
MBD4	GeneCards
ROBO1	GeneCards
SMN2	GeneCards
IL22	GeneCards
ARSB	GeneCards
ORAI1	GeneCards
RPS26	GeneCards
TPH1	GeneCards
STX11	GeneCards
APAF1	GeneCards
MYH11	GeneCards
DPYSL5	GeneCards
NEK1	GeneCards
AGK	GeneCards
MT-ND4	GeneCards
ITPR1	GeneCards
EBF3	GeneCards
TBC1D20	GeneCards
GFM1	GeneCards
MEGF8	GeneCards
SPEN	GeneCards
PRPS1	GeneCards
GALC	GeneCards
LIPA	GeneCards
MT-CO3	GeneCards
SLC26A4	GeneCards
STING1	GeneCards
CHST14	GeneCards
H19	GeneCards
GPRC5A	GeneCards
GAMT	GeneCards
SOX17	GeneCards
TGFBR1	GeneCards
PWRN1	GeneCards
KANSL1	GeneCards
CDC42	GeneCards
VWF	GeneCards
BAD	GeneCards
VTN	GeneCards
TBX1	GeneCards
LRPPRC	GeneCards
MIR24-1	GeneCards
SETD5	GeneCards
SEPTIN9	GeneCards
POMGNT1	GeneCards
FLNB	GeneCards
CRLF1	GeneCards
MT-TW	GeneCards
VPS37D	GeneCards
WAS	GeneCards
IL15	GeneCards
MADD	GeneCards
ATM	GeneCards
ATP5F1A	GeneCards
HSPA1A	GeneCards
LIG4	GeneCards
BMP4	GeneCards
AXDND1	GeneCards
SIN3A	GeneCards
AGTR1	GeneCards
RNF168	GeneCards
CAMP	GeneCards
MYL1	GeneCards
SLC52A3	GeneCards
CD9	GeneCards
ALDH7A1	GeneCards
CSNK1D	GeneCards
VDAC1	GeneCards
KIR3DL1	GeneCards
KCNJ10	GeneCards
CD46	GeneCards
PER2	GeneCards
PTX3	GeneCards
ICOSLG	GeneCards
RNU4ATAC	GeneCards
MIR128-1	GeneCards
ANG	GeneCards
DSG1	GeneCards
UGT1A6	GeneCards
CCK	GeneCards
NDUFB6	GeneCards
ADRB2	GeneCards
U2AF1	GeneCards
SMAD4	GeneCards
CASC2	GeneCards
CD3D	GeneCards
HPGD	GeneCards
CTSD	GeneCards
DKC1	GeneCards
STAT6	GeneCards
CCDC40	GeneCards
SEMA3B	GeneCards
SCARB1	GeneCards
IL3	GeneCards
GLI3	GeneCards
TTC7A	GeneCards
TWNK	GeneCards
PTCH1	GeneCards
TFRC	GeneCards
DNAJB6	GeneCards
TINF2	GeneCards
NAGS	GeneCards
PRKAG2	GeneCards
KAT6A	GeneCards
BCOR	GeneCards
EPRS1	GeneCards
MIR197	GeneCards
MLLT3	GeneCards
NTRK3	GeneCards
MUC4	GeneCards
SERPINF2	GeneCards
MIAT	GeneCards
GNB2	GeneCards
FBN1	GeneCards
HAVCR1	GeneCards
S100A8	GeneCards
DYNC2H1	GeneCards
CSNK1A1	GeneCards
SRP19	GeneCards
TBL2	GeneCards
HYDIN	GeneCards
PEX6	GeneCards
MGMT	GeneCards
BUB1	GeneCards
AIF1	GeneCards
MAP3K1	GeneCards
ALDOA	GeneCards
MT-ND1	GeneCards
AIMP2	GeneCards
IQCB1	GeneCards
EXOSC8	GeneCards
F8	GeneCards
LAMA5	GeneCards
MIR133A1	GeneCards
ACHE	GeneCards
COA1	GeneCards
KRT6A	GeneCards
IL12A	GeneCards
DROSHA	GeneCards
CTCF	GeneCards
MCL1	GeneCards
MIR125A	GeneCards
ATAD3A	GeneCards
PRNP	GeneCards
TRIP13	GeneCards
ADA	GeneCards
CCND3	GeneCards
LAMC1	GeneCards
NEB	GeneCards
EIF2AK3	GeneCards
TMPRSS2	GeneCards
ACADS	GeneCards
TLR3	GeneCards
ERVW-1	GeneCards
ANXA5	GeneCards
ANGPT1	GeneCards
MCCC2	GeneCards
CPT2	GeneCards
H4C11	GeneCards
LSS	GeneCards
MIR15B	GeneCards
HMGA2	GeneCards
EPOR	GeneCards
MIR185	GeneCards
FXR1	GeneCards
HSP90AA1	GeneCards
ANGPT2	GeneCards
NDUFC2	GeneCards
MT-TE	GeneCards
SUCLG1	GeneCards
CXCR5	GeneCards
TMEM67	GeneCards
ITGA4	GeneCards
LOC110806262	GeneCards
VDR	GeneCards
NSUN2	GeneCards
IRF4	GeneCards
PRKCE	GeneCards
BLOC1S1	GeneCards
ROCK1	GeneCards
CD34	GeneCards
H4C9	GeneCards
TGM1	GeneCards
PDPN	GeneCards
DLL3	GeneCards
MIR423	GeneCards
ENG	GeneCards
RTN4	GeneCards
MIR126	GeneCards
RPL26	GeneCards
ARHGAP31	GeneCards
NDUFB10	GeneCards
CCNO	GeneCards
KLF1	GeneCards
IVNS1ABP	GeneCards
MIR125B1	GeneCards
CD163	GeneCards
SNORD116-1	GeneCards
NDUFV3	GeneCards
KRT14	GeneCards
SYT1	GeneCards
ABCG2	GeneCards
IL1RAPL2	GeneCards
PHIP	GeneCards
ASXL3	GeneCards
HNF1A	GeneCards
MEN1	GeneCards
NUP98	GeneCards
STXBP2	GeneCards
RARA	GeneCards
MIR148B	GeneCards
STN1	GeneCards
ATP5F1E	GeneCards
COQ6	GeneCards
NPHP4	GeneCards
MIR205	GeneCards
MYD88	GeneCards
PML	GeneCards
PEX2	GeneCards
CBFB	GeneCards
AOPEP	GeneCards
LOC110806263	GeneCards
UROD	GeneCards
CC2D2A	GeneCards
TBX4	GeneCards
LRP6	GeneCards
MIR145	GeneCards
SERPINH1	GeneCards
AFF2	GeneCards
SH2D3A	GeneCards
RFC2	GeneCards
TLE1	GeneCards
RACK1	GeneCards
MIR30B	GeneCards
MN1	GeneCards
IL2RA	GeneCards
CD59	GeneCards
CD24	GeneCards
ATP6V1B2	GeneCards
KCNJ1	GeneCards
TTR	GeneCards
CCR1	GeneCards
ITGA2B	GeneCards
PSAP	GeneCards
MLLT1	GeneCards
UGT1A9	GeneCards
PRIM1	GeneCards
CRYAA	GeneCards
ATP1A2	GeneCards
STX1A	GeneCards
TNFSF4	GeneCards
TG	GeneCards
OPTN	GeneCards
LYN	GeneCards
BPIFA1	GeneCards
BCL2L11	GeneCards
TGFB3	GeneCards
ACAD9	GeneCards
BMPR2	GeneCards
RBP4	GeneCards
S100A4	GeneCards
COX6B1	GeneCards
MGAT2	GeneCards
PLCB1	GeneCards
LEPQTL1	GeneCards
RPS20	GeneCards
MYRF	GeneCards
IGF2	GeneCards
CTSG	GeneCards
CD80	GeneCards
CHRNA1	GeneCards
FPGS	GeneCards
NUBPL	GeneCards
DNMT1	GeneCards
SOX5	GeneCards
OTX2	GeneCards
MIR486-1	GeneCards
PRKG1	GeneCards
BRIP1	GeneCards
ELAVL4	GeneCards
NFIX	GeneCards
SBF2	GeneCards
CFI	GeneCards
HIBCH	GeneCards
PALB2	GeneCards
FABP1	GeneCards
RNASE3	GeneCards
PSORS1C1	GeneCards
PIK3CG	GeneCards
ACKR1	GeneCards
ANOS1	GeneCards
ETFDH	GeneCards
LPA	GeneCards
PIGA	GeneCards
NDUFAF2	GeneCards
TPP1	GeneCards
UQCC2	GeneCards
BRAT1	GeneCards
STIL	GeneCards
MB	GeneCards
MIR92A2	GeneCards
LIFR	GeneCards
CBL	GeneCards
RPL5	GeneCards
SP1	GeneCards
HSPA9	GeneCards
AXIN2	GeneCards
HCCS	GeneCards
SURF1	GeneCards
DMBT1	GeneCards
MIR23B	GeneCards
TAF1	GeneCards
MIR200A	GeneCards
CD79A	GeneCards
IL3RA	GeneCards
SGCA	GeneCards
PIK3CA	GeneCards
TNPO3	GeneCards
FLT3	GeneCards
MAG	GeneCards
PCDH19	GeneCards
TSPO	GeneCards
SLC9A6	GeneCards
HTT	GeneCards
TSR2	GeneCards
KDM4C	GeneCards
FGF9	GeneCards
[truncated: 713 more rows]

## Sheet: Table S5
Table S5 | Database-based results of ALI/ARDS treatment targets of TDXD
NO.	Gene_name
1	ABCA1
2	ABCB1
3	ACACA
4	ACADM
5	ACADS
6	ACE
7	ACHE
8	ACOX1
9	ACP5
10	ACY1
11	ADIPOQ
12	ADORA2A
13	ADRA2A
14	ADRB1
15	ADRB2
16	AGT
17	AGTR1
18	AGTR2
19	AHR
20	AIFM1
21	AKT1
22	AKT2
23	ALDH1A1
24	ALDH1A2
25	ALDH2
26	ALOX5
27	ALOX5AP
28	ANG
29	ANXA1
30	APOE
31	AR
32	ARX
33	ATP4A
34	BAG1
35	BAZ1B
36	BCHE
37	BCL2
38	BDNF
39	BGLAP
40	BMP6
41	BRCA1
42	CACNA1S
43	CASP7
44	CAT
45	CAV1
46	CCL2
47	CCNA2
48	CCND1
49	CCNE1
50	CCNH
51	CD40LG
52	CDK1
53	CDK2
54	CDK8
55	CDKN1A
56	CEBPA
57	CEBPB
58	CHEK1
59	CHGA
60	CHRM3
61	CHUK
62	CNR1
63	COL1A1
64	COL3A1
65	COX4I1
66	COX5A
67	COX6A2
68	COX6B1
69	COX7B
70	COX8A
71	CPT1A
72	CPT2
73	CREBBP
74	CRLF1
75	CTNNB1
76	CTSD
77	CUL4B
78	CXCR4
79	CYBA
80	CYP11A1
81	CYP17A1
82	CYP19A1
83	CYP1A2
84	CYP2B6
85	CYP2E1
86	CYP3A4
87	DBH
88	DLD
89	DNMT1
90	DPP4
91	DPYD
92	DRD2
93	DRD4
94	EDN1
95	EGF
96	EGFR
97	ENPP1
98	EP300
99	ERBB2
100	ESR1
101	ESR2
102	ETFB
103	EZH2
104	F10
105	F12
106	F2
107	F3
108	F7
109	F9
110	FABP3
111	FADD
112	FAS
113	FASN
114	FBP1
115	FCGR1A
116	FECH
117	FHIT
118	FHL1
119	FKBP5
120	FLAD1
121	FOXA1
122	FOXO1
123	FOXO3
124	GABRA1
125	GABRB3
126	GABRD
127	GABRG2
128	GABRG3
129	GADD45A
130	GADD45B
131	GAMT
132	GJA1
133	GRB2
134	GRIN2A
135	GSK3B
136	GSR
137	GSTM1
138	GSTP1
139	HBA1
140	HBA2
141	HDAC2
142	HMGCR
143	HMOX1
144	HNF4A
145	HSP90AA1
146	HSPA4
147	HSPA5
148	HSPD1
149	HTR1A
150	HTR2A
151	HTR3A
152	IFNG
153	IGF1
154	IGF1R
155	IL13
156	IL1B
157	IL2
158	IL6
159	INSR
160	ITGAL
161	ITGAV
162	ITGB2
163	ITGB3
164	JAK2
165	KCNA1
166	KCNA2
167	KCNB1
168	KCND3
169	KCNH2
170	KCNN4
171	KCNQ1
172	KDR
173	KIF1A
174	KMT2D
175	LCK
176	LDLR
177	LEP
178	MAOA
179	MAP3K1
180	MAPK1
181	MAPK14
182	MAPK3
183	MAPK8
184	MDM2
185	MED12
186	MGMT
187	MMP1
188	MMP10
189	MMP2
190	MMP3
191	MPO
192	NCOA2
193	NCOR1
194	NCOR2
195	NDRG1
196	NFKB1
197	NKX2-1
198	NOS1
199	NOS2
200	NOS3
201	NOTCH1
202	NOTCH2
203	NPPA
204	NPR2
205	NQO1
206	NR1H2
207	NR1H4
208	NR3C1
209	NR3C2
210	NRXN1
211	NSD1
212	ODC1
213	OPRM1
214	ORM1
215	OXT
216	OXTR
217	PAK1
218	PAWR
219	PAX7
220	PCYT1B
221	PGR
222	PIK3R1
223	PIK3R3
224	PLA2G1B
225	PLAT
226	PLAU
227	POLR1B
228	PON1
229	PPARA
230	PPARG
231	PPARGC1A
232	PRKCA
233	PRKCB
234	PRKCD
235	PRSS1
236	PSMB9
237	PTEN
238	PTGER4
239	PTGS1
240	PTGS2
241	PTPN6
242	PYGM
243	RARA
244	RB1
245	RELA
246	REN
247	RXRA
248	RXRB
249	S100A8
250	S100A9
251	SCGB1A1
252	SCN10A
253	SCN5A
254	SELE
255	SERPINE1
256	SERPINF2
257	SHC1
258	SLC19A1
259	SLC19A3
260	SLC30A9
261	SLC52A3
262	SLC6A2
263	SLC6A3
264	SLC6A4
265	SLCO1B1
266	SMAD2
267	SMAD3
268	SMAD4
269	SMARCA2
270	SMARCA4
271	SMARCE1
272	SOD1
273	SOD2
274	SOD3
275	SOS1
276	SP1
277	SPARC
278	SRC
279	SREBF1
280	STAT3
281	STAT5A
282	STUB1
283	STX1A
284	TAP1
285	TCF3
286	THBD
287	THRB
288	TNF
289	TNFRSF1A
290	TNFRSF1B
291	TOP1
292	TP53
293	TPO
294	TRIP4
295	TRPA1
296	TRPV1
297	TRPV3
298	TSC2
299	TUBA1A
300	TUBB
301	TUBB2B
302	TUBG1
303	TXNRD1
304	UBE3A
305	VCAM1
306	VCP
307	VDR
308	VEGFA
309	XBP1
310	XDH
311	ZBTB16

## Sheet: Table S6
Table S6 | PPIN node topology parameters of Top 30 targets for TDXD in ALI treatment
NO.	node_name	Degree	Closeness	Betweenness
1	EP300	47	0.688	365.977
2	CREBBP	46	0.68254	366.992
3	MAPK3	44	0.671875	316.363
4	ESR1	43	0.666667	325.583
5	STAT3	42	0.661538	363.321
6	MAPK1	42	0.661538	285.321
7	SRC	42	0.661538	290.952
8	AKT1	39	0.646617	276.444
9	RELA	37	0.637037	241.612
10	TP53	35	0.627737	195.378
11	PIK3R1	34	0.623188	186.552
12	HSP90AA1	32	0.609929	233.361
13	CTNNB1	32	0.614286	209.01
14	SP1	29	0.601399	119.841
15	MAPK14	28	0.597222	90.8021
16	AR	27	0.593103	75.1159
17	JAK2	27	0.581081	114.346
18	RXRA	27	0.589041	132.67
19	NR3C1	26	0.589041	69.3219
20	SHC1	26	0.565789	53.5634
21	FOXO3	25	0.585034	59.3942
22	EGFR	25	0.577181	46.5209
23	SMAD3	25	0.585034	48.3704
24	NFKB1	24	0.581081	68.9359
25	FOXO1	23	0.577181	68.4682
26	GRB2	23	0.558442	30.6199
27	CAV1	23	0.565789	76.9204
28	CDKN1A	22	0.573333	53.0605
29	RB1	21	0.569536	39.042
30	SMAD2	19	0.554839	32.1488

## Sheet: Table S7
Table S7 | Degree values of 51 compounds of TDXD in ALI treatment
NO.	Mol ID	compound_name	Degree
1	MOL000098	quercetin	30
2	MOL000358	beta-sitosterol	18
3	MOL000422	kaempferol	6
4	MOL000354	isorhamnetin	6
5	MOL000627	Stepholidine	6
6	MOL001551	Betulin	5
7	MOL001454	berberine	5
8	MOL003913	Helveticoside	4
9	MOL005559	Maslinic Acid	4
10	MOL008498	Ursolicacid	4
11	MOL005386	Tauremisin	4
12	MOL002722	Vomifoliol	4
13	MOL000492	(+)-catechin	4
14	MOL000211	Mairin	4
15	MOL000783	Protoporphyrin	3
16	MOL007213	Nuciferin	3
17	MOL001522	(S)-Coclaurine	3
18	MOL012921	Stepharine	2
19	MOL000296	hederagenin	2
20	MOL009148	Catharanthamine	2
21	MOL007341	Alphitolic Acid	2
22	MOL002045	Stigmasterol	2
23	MOL004082	Stearin	2
24	MOL012941	Sylvestrene	2
25	MOL002773	beta-carotene	2
26	MOL000787	Fumarine	2
27	MOL000449	Stigmasterol	2
28	MOL012992	Mauritine D	2
29	MOL012976	Coumestrol	2
30	MOL003927	Dihomolinolenic acid	1
31	MOL003908	Cynotoxin	1
32	MOL003906	K-STROPHANTHOSIDE_qt	1
33	MOL000400	Riboflavine	1
34	MOL012943	Ziziphin	1
35	MOL001540	Spinosin	1
36	MOL004498	12-O-Nicotinoylisolineolone	1
37	MOL001526	Jujuboside A	1
38	MOL012983	Jujubasaponin Vi	1
39	MOL012987	Jujubogenin	1
40	MOL012974	Asimilobine	1
41	MOL012990	Jujuboside C	1
42	MOL006077	Vitamin B1	1
43	MOL011455	20-Hexadecanoylingenol	1
44	MOL012988	Jujuboside A1	1
45	MOL004349	Ruvoside	1
46	MOL000096	(-)-catechin	1
47	MOL008647	Moupinamide	1
48	MOL004350	Ruvoside_qt	1
49	MOL012986	Jujubasaponin V_qt	1
50	MOL012981	Daechuine S7	1
51	MOL012946	zizyphus saponin I_qt	1
